# Supplementary material for: In silico evaluation of molecular virus–virus interactions taking place between Cotton leaf curl Kokhran virus- Burewala strain and Tomato leaf curl New Delhi virus
Source: PeerJ. 2021 Oct 19;9:e12018. doi: 10.7717/peerj.12018 (PMC8532979; doi:10.7717/peerj.12018)
Supplement: Supplemental Information 1 [file peerj-09-12018-s001.xlsx]

## Sheet: ERRAT
			ERRAT Scores CLCuKoV-Bur
			Gene		Quark					RX	I-TASSER					MODELLER					LOMETS
					M1	M2	M3	M4	M5		M1	M2	M3	M4	M5	M1	M2	M3	M4	M5	M1	M2	M3	M4	M5
			CLCuKoV-Bur	Rep	-	-	-	-	-	53	65	54	83	63	65	20	21	18	15	21	15	62	36	33	42
				TrAP	96	93	100	96	88	12.5	93	100	85	48	100	-	-	-	-	-	73	59	67	59	59
				REn	48	60	61	46	57	44.8	84	68	68	24	62	-	-	-	-	-	35	29	14	10	32
				C4	53	77	69	77	91	63.8	65	67	78	79	57	-	-	-	-	-	31	17	24	14	23
				CP	-	-	-	-	-	52	67	65	75	74	80	46	57	43	35	52	20	18	16	18	18
				V2	88	90	76	71	93	61.1	87	67	79	76	70	-	-	-	-	-	41	45	29	38	24
			CLCuMB		71	65	64	74	60	38.8	43	47	41	54	53	-	-	-	-	-	27	14	30	12	17
				βC1
			ERRAT Scores ToLCNDV
					QUARK					RX						MODELLER					LOMETS
											I-TASSER
			DNA -A	Genes	M1	M2	M3	M4	M5	M	M1	M2	M3	M4	M5	M1	M2	M3	M4	M5	M1	M2	M3	M4	M5
				Rep	-	-	-	-	-	53	89.3	76.9	84.8	87.24	88.5	26	25.9	25.9	25.9	26	23	28	31	31	41
				TrAP	63.3	80.2	83.9	71.7	74	5.05	51.2	70.9	66.4	87.24	79.2	-	-	-	-	-	11	5.3	5.3	3	47
				REn	40.6	63.3	79.7	64.1	46.9	36.4	99.2	78.1	87.5	81.25	58.5	-	-	-	-	-	19	14	24	25	30
				C4	84	94	64	94	78	41.3	52	72	86	70	89.5	-	-	-	-	-	0	2	10	18	18
				CP	-	-	-	-	-	54.3	69.4	73.8	70.1	80.24	83	56	56.1	44.3	48.4	51	13	18	21	18	18
				V2	58.1	59.5	84.9	60.1	50.9	79.5	87.5	58.8	81.7	79.8	80.7	-	-	-	-	-	40	39	20	30	22
			DNA B	MP	-	-	-	-	-	2.46	54.4	67.2	65.6	18.14	67.2	-	-	-	-	-	12	10	9.5	4.4	14
				NSP	-	-	-	-	-		60.8	72.5	73.2	41.75	59.7	-	-	-	-	-	6.9	8.9	16	17	6.1

## Sheet: QMEANDisCo
			QMEANDisCo- CLCuKoV-Bur
			Gene		Quark					RX	I-TASSER					MODELLER					LOMETS
					M1	M2	M3	M4	M5		M1	M2	M3	M4	M5	M1	M2	M3	M4	M5	M1	M2	M3	M4	M5
			CLCuKoV-Bur	Rep	-	-	-	-	-	0.65 ± 0.05	0.40 ± 0.05	0.40 ± 0.05	0.48 ± 0.05	0.40 ± 0.05	0.40 ± 0.05	0.30 ± 0.05	0.32 ± 0.05	0.31 ± 0.05	0.30 ± 0.05	0.31 ± 0.05	0.37 ± 0.05	0.40 ± 0.05	0.48 ± 0.05	0.49 ± 0.05	0.38 ± 0.05
				TrAP	0.54 ± 0.12	0.57 ± 0.12	0.54 ± 0.12	0.67 ± 0.12	0.59 ± 0.12	0.45 ± 0.12	0.53 ± 0.12	0.51 ± 0.12	0.57 ± 0.12	0.60 ± 0.12	0.60 ± 0.12	-	-	-	-	-	0.59 ± 0.12	0.54 ± 0.12	0.57 ± 0.12	0.54 ± 0.12	0.54 ± 0.12
				REn	0.43 ± 0.07	0.35 ± 0.07	0.46 ± 0.07	0.39 ± 0.07	0.43 ± 0.07	0.24 ± 0.07	0.38 ± 0.07	0.31 ± 0.07	0.38 ± 0.07	0.32 ± 0.07	0.36 ± 0.07	-	-	-	-	-	0.30 ± 0.07	0.25 ± 0.07	0.24 ± 0.07	0.27 ± 0.07	0.23 ± 0.07
				C4	0.34 ± 0.07	0.33 ± 0.07	0.39 ± 0.07	0.34 ± 0.07	0.35 ± 0.07	0.23 ± 0.07	0.29 ± 0.07	0.33 ± 0.07	0.33 ± 0.07	0.28 ± 0.07	0.33 ± 0.07	-	-	-	-	-	0.28 ± 0.07	0.27 ± 0.07	0.28 ± 0.07	0.26 ± 0.07	0.28 ± 0.07
				CP	-	-	-	-	-	0.66 ± 0.05	0.63 ± 0.05	0.63 ± 0.05	0.66 ± 0.05	0.66 ± 0.05	0.66 ± 0.05	0.30 ± 0.05	0.32 ± 0.05	0.31 ± 0.05	0.30 ± 0.05	0.31 ± 0.05	0.54 ± 0.05	0.54 ± 0.05	0.55 ± 0.05	0.54 ± 0.05	0.54 ± 0.05
				V2	0.54 ± 0.12	0.57 ± 0.12	0.54 ± 0.12	0.67 ± 0.12	0.59 ± 0.12	0.31 ± 0.08	0.31 ± 0.08	0.41 ± 0.08	0.33 ± 0.08	0.34 ± 0.08	0.33 ± 0.08	-	-	-	-	-	0.27 ± 0.08	0.29 ± 0.08	0.27 ± 0.08	0.27 ± 0.08	0.29 ± 0.08
				βC1	0.41 ± 0.08	0.37 ± 0.08	0.39 ± 0.08	0.40 ± 0.08	0.40 ± 0.08	0.27 ± 0.08	0.36 ± 0.08	0.35 ± 0.08	0.31 ± 0.08	0.30 ± 0.08	0.32 ± 0.08	-	-	-	-	-	0.24 ± 0.08	0.24 ± 0.08	0.27 ± 0.08	0.25 ± 0.08	0.26 ± 0.08
			CLCuMB
												QMEANDisCo- ToLCNDV
				QUARK						RX	I-TASSER					MODELLER					LOMETS
			DNA-A	Gene	M1	M2	M3	M4	M5	M	M1	M2	M3	M4	M5	M1	M2	M3	M4	M5	M1	M2	M3	M4	M5
				Rep	-	-	-	-	-	0.65 ± 0.05	0.28 ± 0.05	0.31 ± 0.05	0.43 ± 0.05	0.40 ± 0.05	0.42 ± 0.05	0.31 ± 0.05	0.29 ± 0.05	0.29 ± 0.05	0.29 ± 0.05	0.31 ± 0.05	0.42 ± 0.05	0.41 ± 0.05	0.48 ± 0.05	0.48 ± 0.05	0.33 ± 0.05
				TrAP	0.41 ± 0.07	0.41 ± 0.07	0.42 ± 0.07	0.40 ± 0.07	0.38 ± 0.07	0.32 ± 0.07	0.41 ± 0.07	0.31 ± 0.07	0.27 ± 0.07	0.23 ± 0.07	0.23 ± 0.07	-	-	-	-	-	0.28 ± 0.07	0.24 ± 0.07	0.23 ± 0.07	0.26 ± 0.07	0.31 ± 0.07
				REn	0.37 ± 0.07	0.33 ± 0.07	0.34 ± 0.07	0.41 ± 0.07	0.32 ± 0.07	0.23 ± 0.07	0.34 ± 0.07	0.32 ± 0.07	0.45 ± 0.07	0.37 ± 0.07	0.29 ± 0.07	-	-	-	-	-	0.27 ± 0.07	0.28 ± 0.07	0.27 ± 0.07	0.27 ± 0.07	0.30 ± 0.07
				C4	0.34 ± 0.11	0.34 ± 0.11	0.40 ± 0.11	0.35 ± 0.11	0.40 ± 0.11	0.28 ± 0.11	0.38 ± 0.11	0.41 ± 0.11	0.43 ± 0.11	0.34 ± 0.11	0.31 ± 0.11	-	-	-	-	-	0.28 ± 0.11	0.26 ± 0.11	0.24 ± 0.11	0.28 ± 0.11	0.35 ± 0.11
				CP	-	-	-	-	-	0.65 ± 0.05	0.63 ± 0.05	0.65 ± 0.05	0.64 ± 0.05	0.64 ± 0.05	0.64 ± 0.05	0.63 ± 0.05	0.63 ± 0.05	0.62 ± 0.05	0.62 ± 0.05	0.62 ± 0.05	0.50 ± 0.05	0.51 ± 0.05	0.50 ± 0.05	0.51 ± 0.05	0.51 ± 0.05
				V2	0.42 ± 0.08	0.39 ± 0.08	0.48 ± 0.08	0.41 ± 0.08	0.45 ± 0.08	0.33 ± 0.08	0.31 ± 0.08	0.30 ± 0.08	0.35 ± 0.08	0.38 ± 0.08	0.43 ± 0.08	-	-	-	-	-	0.33 ± 0.08	0.37 ± 0.08	0.36 ± 0.08	0.35 ± 0.08	0.28 ± 0.08
			DNA-B	MP	-	-	-	-	-	0.30 ± 0.05	0.44 ± 0.05	0.43 ± 0.05	0.45 ± 0.05	0.38 ± 0.05	0.39 ± 0.05	-	-	-	-	-	0.23 ± 0.05	0.24 ± 0.05	0.24 ± 0.05	0.23 ± 0.05	0.25 ± 0.05
				NSP	-	-	-	-	-	0.30 ± 0.05	0.35 ± 0.05	0.28 ± 0.05	0.32 ± 0.05	0.32 ± 0.05	0.39 ± 0.05	-	-	-	-	-	0.40 ± 0.05	0.42 ± 0.05	0.38 ± 0.05	0.41 ± 0.05	0.42 ± 0.05

## Sheet: Z-Score
					Z-Score (ProSA) for CLCuKoV-Bur
					Genes	QUARK					I-TASSER					RaptorX	LOMETS
						M1	M2	M3	M4	M5	M1	M2	M3	M4	M5		M1	M2	M3	M4	M5
					Rep	-	-	-	-	-	-3.33	-4.63	-8.6	-3.14	-2.77	-5.63	-0.58	-1.28	-6.32	-6.32	-4.33
					TrAP	-4.03	-3.92	-5.27	-4.92	-4.24	-1.8	-0.9	-1.88	-0.99	-1.83	-4.65	-3.99	-1.99	-0.7	-0.07	-2.56
					REn	-2.54	-2.49	-2.78	-2.92	-0.91	-4.73	-5.44	-4.48	-2.98	-5.35	-1.99	-3.13	-1.63	-0.71	-2.06	-1.28
					C4	-4.04	-3.91	-3.22	-4.47	-4.81	-1.4	-2.64	-1.77	-1.31	-3.35	-0.63	-0.21	-1.76	-2.01	-1.26	-1.72
					CP	-	-	-	-	-	-3.94	-4.78	-5.15	-5.35	-5.36	-6.28	-5.53	-5.55	-5.81	-5.55	-5.55
					V2	-6.45	-5.33	-6.38	-5.55	-5.87	-4.75	-2.51	-4.18	-3.9	-3.22	-2.51	-1.9	-2.29	-2.63	-3.71	-2.21
					Z- Score CLCuMB
					βC1	-	-	-	-	-	-3.04	-3.38	-4.16	-5.29	-2.88	-4.8	-4.38	-5.29	-3.27	-4.55	-4.83
					Z-Score (ProSA) for ToLCNDV
					Genes		QUARK					I-TASSER					RaptorX	LOMETS
							M1	M2	M3	M4	M5	M1	M2	M3	M4	M5		M1	M2	M3	M4	M5
					DNA-A	Rep	-	-	-	-	-	-4.86	-4.52	-6.37	-6.03	-7.14	-5.63	-0.58	-1.28	-6.32	-6.32	-4.33
						TrAP	-4.03	-3.92	-5.27	-4.92	-4.24	-3.31	-3.7	-1.59	-1.83	0.06	-4.65	-3.99	-1.99	-0.7	-0.07	-2.56
						REn	-2.54	-2.49	-2.78	-2.92	-0.91	-3.93	-2.64	-3.91	-3.77	-4.53	-1.99	-3.13	-1.63	-0.71	-2.06	-1.28
						C4	-4.04	-3.91	-3.22	-4.47	-4.81	-3.74	-1.63	-4.33	-1.71	0.01	-0.63	-0.21	-1.76	-2.01	-1.26	-1.72
						CP	-	-	-	-	-	-4.6	-4.6	-4.6	-4.6	-4.6	-5.02	-5.53	-5.55	-5.81	-5.55	-5.55
						V2	-6.45	-5.33	-6.38	-5.55	-5.87	-4.2	-1.52	-4.55	-4.27	-3.6	-2.1	-1.9	-2.29	-2.63	-3.71	-2.21
					DNA-B	MP	-	-	-	-	-	-4.14	-5.1	-5.6	-4.87	-6.02	-1.27	0.73	2.44	0.02	3.59	0.63
						NSP	-	-	-	-	-	-4.05	-3.53		-1.92	-4.57	-5.08	-4.38	-5.29	-3.27	-4.55	-4.83
