# Supplementary material for: In silico evaluation of molecular virus–virus interactions taking place between Cotton leaf curl Kokhran virus- Burewala strain and Tomato leaf curl New Delhi virus
Source: PeerJ. 2021 Oct 19;9:e12018. doi: 10.7717/peerj.12018 (PMC8532979; doi:10.7717/peerj.12018)
Supplement: Supplemental Information 3 [file peerj-09-12018-s003.docx]

| Intra-virus Protein Interaction | | | Inter-Viral protein interaction | | | Intra-virus Protein Interaction | | |
| --- | --- | --- | --- | --- | --- | --- | --- | --- |
| CLCuKoV/Bu  CLCuMuB | CLCuKoV/Bu  CLCuMuB | HADDOCK SCORE | CLCuKoV/Bu  CLCuMuB | ToLCNDV | HADDOCK SCORE | ToLCNDV DNA-A/ DNA-B | ToLCNDV DNA-A/ DNA-B | HADDOCK SCORE |
| Rep | **Rep** | **-196.8** | Rep | **Rep** | **-201** | Rep | **Rep** | -135.7 |
| TrAP | **-154.2** | TrAP | **-195.1** | TrAP | **-173.1** |
| REn | -102.1 | REn | -141 | Ren | -15 |
| C4 | -125.2 | C4 | -196 | C4 | -89.6 |
| CP | -203.9 | CP | -192.4 | CP | -110.1 |
| V2 | **-155.5** | V2 | -190.8 | V2 | -96.6 |
| ßC1 | -136.8 | MP | **-279.8** | MP | -63.5 |
| NSP | **-241.5** | NSP | -91.5 |
| TrAP | Rep | -132.7 | TrAP | Rep | -71.6 | TrAP | Rep | -191.8 |
| TrAP | -75.7 | TrAP | -103.9 | TrAP | -120.3 |
| REn | -43.7 | REn | -58 | REn | -44.8 |
| C4 | -85.8 | C4 | -78.1 | C4 | -104.5 |
| CP | -75.8 | CP | -82.9 | CP | **-133.7** |
| V2 | -108.2 | V2 | -85.9 | V2 | -78.0 |
| ßC1 | -93.3 | MP | -134.9 | MP | -73.5 |
| NSP | -129.6 | NSP | -78.2 |
| REn | Rep | -102.9 | REn | Rep | -58.6 | REn | Rep | -25.6 +/- 21.2 |
| TrAP | -17.4 | TrAP | -103.2 | TrAP | -62.9 +/- 18.0 |
| REn | -3.9 | REn | 6 | REn | 5.9 +/- 21.7 |
| C4 | -35.3 | C4 | -45.6 | C4 | -64.7 +/- 3.7 |
| CP | -66.2 | CP | -63.7 | CP | -17.6 +/- 23.0 |
| V2 | -25.4 | V2 | -30.3 | V2 | -55.6 +/- 13.0 |
| ßC1 | -28.9 | MP | -109.1 | MP | -15.6 +/- 4.8 |
| NSP | **-217.8** | NSP | -37.9 +/- 13.0 |
| C4 | Rep | -131.2 | C4 | Rep | -65.1 | C4 | Rep | -94.3 +/- 15.9 |
| TrAP | -73.6 | TrAP | -73.3 | TrAP | -118.5 +/- 23.3 |
| REn | -39.1 | REn | -35.4 | REn | -55.3 +/- 11.3 |
| C4 | -74.6 | C4 | -79.3 | C4 | -150.4 +/- 13.2 |
| CP | -73.3 | CP | -91.9 | CP | -133.6 +/- 5.6 |
| V2 | -64.9 | V2 | -74.4 | V2 | -98.4 +/- 15.0 |
| ßC1 | -54.9 | MP | **-160.9** | MP | -115.2 +/- 12.8ac4_m |
| NSP | **-129.2** | NSP | -112.1 +/- 3.3 |
| CP | Rep | -130.6 | CP | Rep | -100.3 | CP | Rep | -127.9 +/- 16.3 |
| TrAP | -74.8 | TrAP | -185.3 | TrAP | -147.3 +/- 14.4 |
| REn | -38.8 | REn | 7.8 | REn | -58.3 +/- 18.3 |
| C4 | -52.9 | C4 | -82.5 | C4 | -136.7 +/- 2.1 |
| CP | -83.6 | CP | -163.4 | CP | -110.6 +/- 14.5 |
| V2 | -94.9 | V2 | -64.2 | V2 | -119.8 +/- 10.6 |
| ßC1 | -93.7 | MP | **-166.9** | MP | -102.5 +/- 20.2 |
| NSP | -110.6 | NSP | -87.2 +/- 8.5 |
| V2 | Rep | -149.3 | V2 | Rep | -71.3 | AV2 | Rep | -67.0 +/- 6.2 |
| TrAP | -109.9 | TrAP | -87.5 | TrAP | -83.3 +/- 8.5 |
| REn | -48.7 | REn | -20.1 | REn | -49.1 +/- 12.3 |
| C4 | -76.6 | C4 | 74.2 | C4 | -95.0 +/- 4.2 |
| CP | -94.7 | CP | -98 | CP | -115.7 +/- 1.3a |
| V2 | -96.9 | AV2 | -78.7 | V2 | -48.8 +/- 24.7 |
| ßC1 | -66 | MP | -**199.4** | MP | -69.9 +/- 15.1 |
| NSP | -94.1 | NSP | -89.3 +/- 11.2 |
| ßC1 | Rep | -136.4 | ßC1 | Rep | -48.6 | MP | Rep | -78.3 +/- 12.0 |
| TrAP | -83.2 | TrAP | -76.2 | TrAP | -68.4 +/- 13.3 |
| REn | -36.6 | REn | -141.1 | REn | -14.7 +/- 7.7 |
| C4 | -68 | C4 | -65.8 | C4 | -113.8 +/- 6.5 |
| CP | -78 | CP | -62.9 | CP | -103.3 +/- 5.6 |
| V2 | -61.6 | AV2 | -75.7 | AV2 | -77.1 +/- 13.8 |
| ßC1 | -47.9 | MP | **-199.7** | MP | -62.1 +/- 4.0 |
| NSP | **-96.3** | NSP | -74.7 +/- 4.2 |
|  |  |  |  |  |  | NSP | Rep | -74.4 +/- 16.3 |
|  |  |  |  | TrAP | -82.8 +/- 12.5 |
|  |  |  |  | REn | -22.2 +/- 16.8 |
|  |  |  |  | C4 | -133.9 +/- 7.8 |
|  |  |  |  | CP | -82.0 +/- 5.4 |
|  |  |  |  | AV2 | -81.3 +/- 9.8 |
|  |  |  |  | MP | -69.0 +/- 9.2 |
|  |  |  |  | NSP | -110.1 +/- 2.3 |
