# Supplementary material for: In silico evaluation of molecular virus–virus interactions taking place between Cotton leaf curl Kokhran virus- Burewala strain and Tomato leaf curl New Delhi virus
Source: PeerJ. 2021 Oct 19;9:e12018. doi: 10.7717/peerj.12018 (PMC8532979; doi:10.7717/peerj.12018)
Supplement: Supplemental Information 4 [file peerj-09-12018-s004.xlsx]

## Sheet: Rep (CLCuKoV-Bu) _ToLCNDV
Rep (CLCuKoV-Bu)-Rep (ToLCNDV)			HADDOCK SCORE	Error	RMSD	R_Error	Desolvation Energy	D_Error	Cluster Size	Van der waals energy	V_Error	Electrostatic Energy	E_Error	Restraints violation Energy	RT_Error	Burried Surface Area	B_Error	Z-Score	CLusters
			a.u.		Å		kcal/mol
			-199.9	4.6	25.3	0.3	-165.5	6.9	33	-145.4	5.9	-215.3	14.7	1541	77.29	3825.9	60.7	-1.4	1
			-136	5.8	9.2	0.6	-133.8	9.2	11	-121.3	7.6	-313.1	33.7	1817.2	92.95	3552.4	206.3	0.5	2
			-201	8.4	14.6	0.2	-159	4.5	10	-138.9	7.5	-450.1	29.6	1869.5	118.16	3927.4	171.4	-1.4	3
			-162.8	25.1	4.4	0.8	-148.6	8.5	8	-94.6	6.1	-293.2	70.9	1390	111.65	2922.9	135	-0.3	4
			-124.4	17.9	19.6	0.1	-158.6	11	6	-114.3	23.4	-146.9	35.9	1779.3	101.33	3310.6	404.2	0.8	5
			-186.7	28.9	1	0.7	-157.2	3.6	6	-117.9	20.3	-313.1	48.9	1510.2	195.53	3678.1	382.3	-1	6
			-95	7.4	25.1	0.4	-152.8	6.2	5	-102	2.1	-202.1	27.7	2001.9	41.81	3039.4	147.9	1.7	7
			-162.7	20.4	27	0	160.1	6.3	5	-98.1	6.3	-181.8	18.7	1319.3	134.28	2798	71	-0.3	8
			-123.3	11.7	23.9	0.2	-142.2	14	4	-98.2	6.5	-217.3	45.9	1605	22.49	3042.5	173.4	0.8	9
Rep (CLCuKoV-Bu)-TrAP (ToLCNDV)			HADDOCK SCORE	Error	RMSD	R_Error	Desolvation Energy	D_Error	Cluster Size	Van der waals energy	V_Error	Electrostatic Energy	E_Error	Restraints violation Energy	RT_Error	Burried Surface Area	B_Error	Z-Score	CLusters
			a.u.		Å		kcal/mol
			-169.1	6.7	13.9	0.7	-144.9	9.3	14	-120	9.5	-117.1	48.4	1192.1	74.6	3293.1	317.8	-0.2	1
			-186.2	14.2	3	0.1	-153.2	9.9	12	-133	3.4	-172.4	3.4	1345	131.03	3613	85.3	-1.3	2
			-154.5	14.1	16	0.1	-125.5	9	11	-111.4	11.2	-231.5	31.8	1287.5	124.09	3195.9	256.8	0.7	3
			-158.6	16.4	12.1	0.1	-155.5	14.4	11	-102.1	9	-158.7	26.9	1307.6	73.03	3011	84.6	0.5	4
			-170.7	7.5	9.7	0.1	-144.9	12.2	10	-102.4	4.7	-211.7	20.1	1189.1	119.92	3457.6	36.9	-0.3	5
			-143.4	13.5	15.6	0.5	-145.7	7.9	9	-99.5	8.7	-174.7	40	1368.1	47.44	3059.2	226.6	1.4	6
			-195.1	14.9	1.9	1.6	-129.7	6	7	-134.5	10.7	-177	38.2	1044.5	117.11	3795.1	259.9	-1.8	7
			-171.2	9.3	2.1	0.1	-133.7	7.3	5	-129	5.2	-162.2	24.2	1239.5	18.33	3486	128.7	-0.3	8
			-169.1	13.2	17.9	0.1	-151.4	8.2	6	-113	8.3	-142.3	18.8	1236.4	53.19	3135	134	-0.2	9
Rep (CLCuKoV-Bu)-REn (ToLCNDV)			HADDOCK SCORE	Error	RMSD	R_Error	Desolvation Energy	D_Error	Cluster Size	Van der waals energy	V_Error	Electrostatic Energy	E_Error	Restraints violation Energy	RT_Error	Burried Surface Area	B_Error	Z-Score	CLusters
			a.u.		Å		kcal/mol
			-135.8	5.5	15.5	0.1	-111.1	6.4	15	-129.9	8.5	-250.3	28.9	1553.4	125.42	3435.1	178.9	-1.4	1
			-123.3	12.7	10	0.2	-132.7	6.6	6	-112.4	8.9	-223.1	28.9	1664.2	110.78	3212	203	-0.4	2
			-141	13.5	7.2	0.2	-116.8	11.8	6	-131.8	2.6	-289.3	39.9	1654.9	100.95	3433.6	120.1	-1.8	3
			-119.6	31.2	15.5	0.1	-118.1	6.3	4	-118.4	6.4	-257.5	57.2	1684.1	118.48	3284.2	117.9	-0.1	4
			-126.6	8.5	9.5	0.4	-112.4	3.8	5	-118	9.2	-194.2	36.7	1444	53.52	3231.5	171	-0.7	5
			-110.6	13.8	12.6	0.1	-102.4	12.3	4	-110.3	8.2	-256.3	46	1533.7	105.01	3148.4	80.9	0.6	6
			-110.4	22.1	9.3	0.1	-102.3	5.1	5	-120	14.6	-239.3	15.5	1697.5	124.56	3407.2	229.2	0.6	7
			-108.7	33.3	10.3	0.1	-100.7	11.9	5	-104.9	7.2	-286.9	86.3	1542.3	114.51	3075.2	224.5	0.7	8
			-103.8	18.5	13.4	0.1	-99.7	7.8	5	-111	5	-306.2	45.6	1682.3	81.87	2996	109.4	1.1	9
Rep (CLCuKoV-Bu)-C4 (ToLCNDV)			HADDOCK SCORE	Error	RMSD	R_Error	Desolvation Energy	D_Error	Cluster Size	Van der waals energy	V_Error	Electrostatic Energy	E_Error	Restraints violation Energy	RT_Error	Burried Surface Area	B_Error	Z-Score	CLusters
			a.u.		Å		kcal/mol
			-196	13.8	1	0.6	-104.1	4.2	24	-93.6	7.1	-232.3	366.3	482.2	95.69	2407.5	53.6	-2.1	1
			-185.8	10.2	6.9	0.1	-104.2	6.7	9	-90	8.3	-256.4	16.8	596.8	47.54	2611.9	47	-0.9	2
			-185	3.9	2.7	0	-107.5	24.4	7	-97.7	4.3	-176.6	24.4	555.3	83.5	2493.2	78	-0.8	3
			-183.5	12.4	6.1	0.1	-113.7	13.1	6	-89.3	6.7	-145.5	32.4	486.3	65.22	2291.9	93	-0.6	4
			-174.9	5.1	6.9	0.1	-105.9	-10.2	12	-92.1	3.4	-148.8	51.1	518.9	71.98	2184.6	75.4	0.4	5
			-174.9	4.7	6.7	0.3	-103.3	8.7	9	-83.9	7.3	-168.8	25.2	461.1	32.85	2436.8	74.4	0.4	6
			-172.5	15.7	7	1	-113.6	11.6	6	-78	6.9	-1170.1	19.2	531.5	69.12	2071.8	73.5	0.7	7
			-171.3	10.7	3.4	0.2	-99	2.5	11	-82	6	-248.1	86.6	594.2	51.52	2369.8	55.2	0.8	8
			-169.3	7.6	4.7	0.1	-106.5	6.2	7	-85.7	8.2	-162.5	21.1	554.2	42.12	2293.5	52.1	1	9
Rep (CLCuKoV-Bu)-CP (ToLCNDV)			HADDOCK SCORE	Error	RMSD	R_Error	Desolvation Energy	D_Error	Cluster Size	Van der waals energy	V_Error	Electrostatic Energy	E_Error	Restraints violation Energy	RT_Error	Burried Surface Area	B_Error	Z-Score	CLusters
			a.u.		Å		kcal/mol
			-192.4	2.6	8.9	0.1	-158.1	10.1	114	-100.8	3	-169.8	16.1	1004.6	123.51	2903.8	66	-1.7	1
			165.2	6.4	10.7	0.2	-131.7	3.3	20	-89.9	10.3	-226.3	25.2	1017.4	64.33	2945	127.4	0	2
			-172.5	22.2	25.3	0.1	-118.5	7.8	6	-95.4	7.7	-285.5	51	985.2	150.06	2980	187.9	-0.6	3
			-165.2	10	21.8	0.5	-136.3	16.8	6	-92.5	7.1	-200.5	37.2	1037.6	74.75	2856.5	-113.9	0	4
			-151.2	6.6	22.4	0.3	-130.2	14	4	83.1	5.4	-230.5	14.2	1082	60.42	2621.7	104.6	1.1	5
			-163.4	7.7	13.2	0.3	-100.2	10.5	4	-106.4	9.3	-331.4	48.6	1094.8	120.65	3589.6	172.3	0.1	6
			-148.4	9.8	28.3	0.1	-117.2	8.5	5	-92.6	4.3	-224.6	19.4	1062	111.93	2881.2	121.4	1.3	7
																			8
																			9
Rep (CLCuKoV-Bu)-V2 (ToLCNDV)			HADDOCK SCORE	Error	RMSD	R_Error	Desolvation Energy	D_Error	Cluster Size	Van der waals energy	V_Error	Electrostatic Energy	E_Error	Restraints violation Energy	RT_Error	Burried Surface Area	B_Error	Z-Score	CLusters
			a.u.		Å		kcal/mol
			-190.8	13.5	10.1	0.1	-107.6	9.1	5	-97.2	3	-319.9	30	778.9	70.77	3012.7	62.9	-1.3	1
			-190.5	21.9	11.3	0.2	-105.9	7.4	5	-89.9	-11.2	-370.1	33.3	793.1	53.13	2815.2	148	-1.2	2
			-187.6	10.9	6.4	0.1	-107.6	17.3	5	-96.1	11.1	-319.2	24	799	44.63	2730	142.6	-0.9	3
			-185.6	8.7	8.1	0.1	-121.1	13.2	24	-94.5	5.7	-226.8	17.7	754.2	90.76	2779.2	57.8	-0.7	4
			-181.7	4.5	4.5	0.1	-122.5	-5.2	7	-101.4	-6.9	-225.3	50.9	871.9	103.26	2592	99.6	-0.3	5
			-179.1	11.2	10.6	0	-111.1	21.1	7	-100.2	10.9	-201	35.9	724.1	60.96	2865.4	131.6	0	6
			-174.3	16.3	10	0.1	-121.6	14.6	5	-96.1	4	-173.1	42.1	780.1	67.9	2495	74.5	0.5	7
			-167.9	-3.5	7.3	0.3	-105.4	8.9	4	-107.6	11.8	-163	21.8	777.9	46.9	2745.4	236.6	1.2	8
			-166	7.5	7.4	0.1	-109	11.1	15	-97.5	6.5	-189.7	48.1	783.6	32,35	2624.5	116.7	1.3	9
Rep (CLCuKoV-Bu)-MP (ToLCNDV)			HADDOCK SCORE	Error	RMSD	R_Error	Desolvation Energy	D_Error	Cluster Size	Van der waals energy	V_Error	Electrostatic Energy	E_Error	Restraints violation Energy	RT_Error	Burried Surface Area	B_Error	Z-Score	CLusters
			a.u.		Å		kcal/mol
			-279.8	11.4	10.6	0	-125.7	-8.3	47	-120.5	6.2	-429.9	36.9	523	56.06	3938.9	106.4	-2	1
			-259.2	12	13.4	0.2	-110.9	6.8	7	-125	6.9	-373.3	60.4	514	44.67	3636.3	71	-1.2	2
			-238.3	39.2	1.8	1.1	-131.3	16.9	9	-114.4	13.4	-255.8	41.5	586.2	93.49	3470.3	212.8	-0.3	3
			-237.5	12.1	6.2	0.1	-122.1	3.9	26	-110.1	17.7	-329.4	42.6	605.1	96.57	3417.3	204.4	-0.3	4
			-235.9	3.3	4.7	0.3	-139.1	9	14	-106	2.1	-220.5	27.6	534.1	53.71	3033.7	94.4	-0.2	5
			-233.1	8.2	4.1	0.3	-128.2	7.6	14	-106.8	4.3	-255.4	32.1	530.1	56.41	3091	59.1	-0.1	6
			-216.9	20	11.8	0.2	-111.2	14.2	5	-118.2	3	-240	23.5	605.1	106.23	3478.3	154.9	0.6	7
			-210.3	5.3	7.3	0.8	-128.4	2.8	9	-83.5	10.5	-275.7	50.5	567.7	26.3	2667.8	143.3	0.9	8
			-204	12.2	18.2	0.2	-93.5	12.1	8	-10	3.1	-278.7	37.3	549.5	32.5	31889	118.7	1.1	9
Rep (CLCuKoV-Bu)-NSP (ToLCNDV)			HADDOCK SCORE	Error	RMSD	R_Error	Desolvation Energy	D_Error	Cluster Size	Van der waals energy	V_Error	Electrostatic Energy	E_Error	Restraints violation Energy	RT_Error	Burried Surface Area	B_Error	Z-Score	CLusters
			a.u.		Å		kcal/mol
			-241.5	8.2	13.1	5.9	-144	6.1	24	-130.1	5.9	-197.9	22.4	721.5	123.54	3733.4	199.9	-2.1	1
			-223.4	9.8	14.9	-0.7	-144	10.8	17	-115	4.2	-216.8	21.3	789.7	79.22	3345.7	110.8	-0.8	2
			-221.7	6.2	18.1	0.1	-150.3	6.7	35	-107.1	5.6	-275.1	41.4	906.7	61.92	2960.4	111.7	-0.7	3
			-217.8	13	2.1	0.2	-124.3	6.8	8	-114.5	7.6	-333.8	51.1	877.9	168.69	3677.7	74.8	-0.5	4
			-211.9	10.5	18.5	0.2	-140.8	8.7	13	-107.5	5.3	-185.8	24.9	736.3	87.73	2983.7	95.5	-0.1	5
			-211.4	14.3	6.3	0.2	-157.1	2.6	10	-108.7	13.2	-194.3	34.6	933	141.73	2939.2	150.1	0	6
			-198.3	13.7	14.3	0.1	-140.4	7.7	6	-101.5	8.8	-161.1	38.7	758.6	113.39	3116.5	196.8	0.9	7
			-196.4	14.6	20.6	0.1	-131.6	10	8	-98.7	7.6	-179.6	34	698.6	82.47	2620.6	161.6	1	8
			-194.9	8.9	16.7	0.1	-133.6	5.1	8	-113.5	4.9	-197.8	40.4	918.4	63.45	3357.9	68	1.1	9

## Sheet: TrAP (CLCuKoV-Bu) _ToLCNDV
TrAP (CLCuKoV-Bu)-Rep (ToLCNDV)		HADDOCK SCORE	Error	RMSD	R_Error	Desolvation Energy	D_Error	Cluster Size	Van der waals energy	V_Error	Electrostatic Energy	E_Error	Restraints violation Energy	RT_Error	Burried Surface Area	B_Error	Z-Score	CLusters
		a.u.		Å		kcal/mol
		-71.6	13.8	7.3	0.1	-68.9	10	6	-106.7	5	-134.1	19.8	1307.8	66.52	2713.7	60.7	-1.5	1
		-70.5	5.4	4.8	0.1	-53.6	10.9	5	-100.8	6.2	-241.3	45.8	1322.1	127	2844.6	108.6	-1.4	2
		-60.8	1.7	7.4	0.1	-67.5	10.3	11	-104.4	5.4	-100.5	27.4	1313	50.04	2608	105.2	-0.8	3
		-54.3	18.6	7.5	0.1	-60.4	2.5	7	-87.7	3	-186.8	30.2	1311.3	154.82	2577.3	70	-0.4	4
		-45.6	6.7	7.9	0	-64.4	13.5	9	-92.9	2.7	-153.7	23.7	1423.5	121.09	2373.6	129.3	0.1	5
		-43	18.3	2.7	0.2	-58.8	12	9	-79.4	15.4	-227.7	16.9	1407.6	184.79	2238.1	131.8	0.3	6
		-41.1	6.1	7	0.1	-53.5	8.3	6	-86.1	4.6	-164.9	50.3	1314.9	130.47	2610.7	120	0.4	7
		-39.9	14	4.6	0.2	-60.8	4.9	5	-85.8	13	-181.2	34.9	1429.8	99.17	2589	68.6	0.5	8
		-30.6	5	7.5	0	-59.8	14.2	4	-83.3	11.7	-96.8	31	1318.2	39.96	2342.1	115.6	1	9
TrAP (CLCuKoV-Bu)-TrAP (ToLCNDV)		HADDOCK SCORE	Error	RMSD	R_Error	Desolvation Energy	D_Error	Cluster Size	Van der waals energy	V_Error	Electrostatic Energy	E_Error	Restraints violation Energy	RT_Error	Burried Surface Area	B_Error	Z-Score	CLusters
		a.u.		Å		kcal/mol
		-103.9	6	2.5	0.1	-41.9	2.9	77	-105.2	5.8	-220	37.3	872	98.09	2889.2	577.5	-1.7	1
		-102.6	15.9	0.8	0.5	-38.5	12.1	18	-103.2	4	-172.9	31.8	735.9	76.46	2732.7	98.3	-1.6	2
		-87.5	3.7	1.7	0.5	-37.5	6.1	26	-95.6	7.3	-186.4	36.4	828.4	18.82	2756.8	111.8	-0.6	3
		-77.6	25.1	11.7	0.1	-40.9	7.9	9	-80.2	9.9	-163.8	26.2	763.3	113.2	2188.6	205.8	0.1	4
		-74.8	15	11.6	0.1	-37.6	4.2	9	-93.9	5.7	-175.8	41	919	120.53	2513.2	141.9	0.3	5
		-70.7	11.8	11.7	0.1	-46.6	2.8	8	-79.6	7.2	-170.8	51.4	896.6	128.35	2409.6	142.1	0.6	6
		-70.5	6.9	11.6	0	-41.6	7.7	10	-93.2	7.3	-161.3	25.6	964.9	68.96	2377.6	78.2	0.6	7
		-65.8	14	2.6	0.1	-38.5	7.6	6	-83.6	6.5	-177.8	40.6	918	79.72	2446.6	91.5	0.9	8
		-62.1	18.9	11.6	0.1	-35.8	3.8	4	-87	9.4	-161.3	47	929.1	148.26	2487.1	135.7	1.2	9
TrAP (CLCuKoV-Bu)-REn (ToLCNDV)		HADDOCK SCORE	Error	RMSD	R_Error	Desolvation Energy	D_Error	Cluster Size	Van der waals energy	V_Error	Electrostatic Energy	E_Error	Restraints violation Energy	RT_Error	Burried Surface Area	B_Error	Z-Score	CLusters
		a.u.		Å		kcal/mol
		-58	13.8	0.9	0.6	-26.6	5.2	14	-96.2	4	-262.1	33.8	1172.8	110.88	2899	87.3	-2.5	1
		-14.6	3.3	5.7	0.1	-30.3	7.4	7	-102.7	8.4	-138.9	42.3	1461.7	78.44	2730.2	41.9	-0.8	2
		-8.4	15.9	5	0.2	-30.9	7	16	-89.8	15	-160.3	29.1	1443.8	150.85	2603	86.1	-0.5	3
		-3.8	18.8	4.9	0.1	-18.9	3.5	4	-91.3	44	-160.5	44	1384.8	48.27	2514.6	102.7	-0.3	4
		15	4	10.1	0.1	-18.3	5.4	5	-76.5	3.5	-228.7	44.3	1555.2	52.89	2226.8	42.8	0.4	5
		20.6	6.6	12.5	0.1	-14.3	5.6	4	-72.6	7.5	-177	35.5	1492.4	72.56	2164.8	102.4	0.7	6
		21.4	8.2	4.6	0.4	-7.2	6.8	4	-73.7	6.9	-250.5	49.4	1524.2	81.07	2261.4	94.1	0.7	7
		21.7	19.5	16.6	0.1	-7.7	5.1	4	-88	18.4	-185.2	46	1545	76.21	2249.9	168.4	0.7	8
		22.8	-34.8	4.2	0.1	-12.7	8.7	4	-66.6	20.1	-224.4	56.2	1469.6	207	2332.5	116.1	0.8	9
TrAP (CLCuKoV-Bu)-AC4 (ToLCNDV)		HADDOCK SCORE	Error	RMSD	R_Error	Desolvation Energy	D_Error	Cluster Size	Van der waals energy	V_Error	Electrostatic Energy	E_Error	Restraints violation Energy	RT_Error	Burried Surface Area	B_Error	Z-Score	CLusters
		a.u.		Å		kcal/mol
		-78.1	10.1	2.6	0.4	-4.4	2.9	15	-80.9	4.8	-143.3	-20.1	358.7	50.54	2137	24.9	-1.6	1
		-66.1	4.3	11.3	0.4	-11.5	5	48	-62	6.3	-186.3	27.9	447.2	98.19	1921	46.7	-0.8	2
		-65.4	7.3	13.9	0.1	-16.6	5.5	7	-71.4	7	-93.2	43.6	412.6	47.95	1951	35.9	-0.8	3
		-58.8	6.6	9.1	0.2	-5	3.8	4	-71.8	7.8	-127.8	37.8	436.2	40.26	1967.6	68.1	-0.4	4
		-56.6	11.5	13.5	0.2	0.6	2.3	5	-66.5	3.5	-187.7	39.5	468.7	55.08	1836.9	84.9	-0.2	5
		-55.6	7.7	12.9	0.3	-20.9	6	22	-63.3	4.6	-116.6	15.8	519.6	14.92	1707	49	-0.2	6
		-51.9	7.5	12.6	0.4	-17	5.4	6	-60.8	3.9	-100.2	12.9	459.4	16.54	1825	172.6	0.1	7
		-38.1	6.9	12.1	0.2	-8.7	7.5	5	-57.4	9.1	-125.2	55.6	530.5	48.45	1720	44.5	1	8
		-37.9	11.7	6.5	0.1	0.2	4.6	8	-64.7	5.1	-109.6	22.8	484.1	57.27	1982	24.9	1	9
TrAP (CLCuKoV-Bu)-CP (ToLCNDV)		HADDOCK SCORE	Error	RMSD	R_Error	Desolvation Energy	D_Error	Cluster Size	Van der waals energy	V_Error	Electrostatic Energy	E_Error	Restraints violation Energy	RT_Error	Burried Surface Area	B_Error	Z-Score	CLusters
		a.u.		Å		kcal/mol
		-82.9	3.2	2.2	0.2	-3.81	8.9	50	-90	5.2	-156.6	54.1	765.1	62.21	2647.5	111.4	-1.6	1
		-79.5	2	8.7	0.1	-36.9	4.3	13	-87.7	9.5	-129.2	50	709.4	66.04	2583.9	52.3	-1.4	2
		-75	3.1	8.8	0	-40.9	5.4	22	-79.8	1.8	-125.6	81	708.1	144.79	2306.2	54.6	-1.1	3
		-68.1	16.3	8.9	0	-44.7	2.8	7	-73.6	7.7	-142.7	56.9	786.9	22.09	2339.5	173.3	-0.6	4
		-54.3	6.4	1.5	0.4	-33.8	7.7	29	-71.9	3.8	-164.3	53.2	842.4	96.85	2411.3	107.1	0.3	5
		-51.5	3.2	1.7	0.3	-44.9	3.8	9	-70.3	8.8	-109.3	36.6	855.6	64.67	2393.5	126.9	0.5	6
		-50.7	25.3	0.9	0.5	-39.6	5.4	5	-66.9	5.1	-119.7	66.2	797.1	110.53	2240.7	185.7	0.6	7
		-47.2	3.5	1.4	0.2	-37.9	3.5	10	-72	7.6	-125	28.5	876.4	18.87	2240	131.5	0.8	8
		-42.5	12.8	2	0.1	-25.6	8.8	5	-74.8	6.1	-123.9	53.9	827	120.75	2384.7	203.3	1.1	9
TrAP (CLCuKoV-Bu)-AV2 (ToLCNDV)		HADDOCK SCORE	Error	RMSD	R_Error	Desolvation Energy	D_Error	Cluster Size	Van der waals energy	V_Error	Electrostatic Energy	E_Error	Restraints violation Energy	RT_Error	Burried Surface Area	B_Error	Z-Score	CLusters
		a.u.		Å		kcal/mol
		-85.9	4.6	0.8	0.5	-5.7	2	6	-84.1	6.4	-304	34	647.4	69.24	2327.5	62.8	-1.4	1
		-82.9	6.8	5.3	0.4	-15.8	5.6	9	-79.1	7.6	-280.1	54.4	681.1	88.57	1243.7	40.4	-1.2	2
		-78.2	9.6	8.5	0.2	-17.4	3.1	8	-87.6	10.9	-201.9	26.1	672.2	112.28	2354.5	183.5	-0.9	3
		-73.2	10.6	12	0.1	-10.1	6	10	-84.9	13.1	-211.3	8.5	640.1	53.03	2286.2	106.3	-0.6	4
		-70.9	8.9	11.6	0.3	-16.6	7.6	6	-79.2	8.9	-16.6	7.6	699.3	71.63	2326.9	123.6	-0.5	5
		-57.2	0.9	2.6	0.6	-17	8.3	6	-70.8	9.3	-207.2	42.9	721.2	69.57	2279.8	65.3	0.4	6
		-54.4	20.2	11.6	0.2	-11.9	0.2	6	-71.3	3.1	-259.5	29.8	807.4	134.16	2181.8	116.3	0.6	7
		-45.1	9.3	8.3	0.2	-8.9	11.4	6	-83.5	2.7	-157.3	36.9	787.7	23.1	2184.2	79.4	1.1	8
		-43.9	8.7	12.1	0	0.8	3.9	4	-74.8	4.5	-236.1	13.2	772.4	52.5	2124.3	113.3	1.2	9
TrAP (CLCuKoV-Bu)-MP (ToLCNDV)		HADDOCK SCORE	Error	RMSD	R_Error	Desolvation Energy	D_Error	Cluster Size	Van der waals energy	V_Error	Electrostatic Energy	E_Error	Restraints violation Energy	RT_Error	Burried Surface Area	B_Error	Z-Score	CLusters
		a.u.		Å		kcal/mol
		-134.9	12.3	0.7	0.5	-23.5	8.6	11	-86.8	7.3	-256.1	69.8	266.2	82.2	2647.1	27.6	-2.4	1
		-110.9	6.3	8.5	0.1	-24.8	5.3	5	-90.4	2.6	-215.6	41.6	475	69.44	2443.4	40.8	-1	2
		-98.2	9.8	8	0.3	-14.7	1.4	9	-76.4	5.9	-254.2	22.1	437.1	102.94	2353.3	60.3	-0.3	3
		-95.3	5.8	8.5	0.1	-26.8	8.9	17	-65.5	4.9	-214.8	19.9	398.9	79.27	2041.6	49.9	-0.1	4
		-88.4	7.3	3.8	0.2	-37.2	4	22	-70.3	5.3	-122.4	32.8	435.9	97.86	1938.8	125.9	0.3	5
		-88.1	7.9	2.2	0.1	-17.8	5.6	5	-79.5	3.4	-164.8	25.4	420.9	53.51	2201.6	58.7	0.3	6
		-84.1	3.6	8.5	0.1	-13.2	6.9	17	-78.6	5.8	-235.2	50.5	547.2	128.31	2397.3	47.9	0.6	7
		-79.9	13.3	8.4	0	-34.4	8.3	4	-67.6	3.3	-139.6	36.1	500	129.98	2191.4	54.7	0.8	8
		-79.8	7.8	4	0.3	-26.2	2.9	4	-62.9	6.3	-146.1	14.4	385.2	18.66	1801.8	31.8	0.8	9
TrAP (CLCuKoV-Bu)-NSP (ToLCNDV)		HADDOCK SCORE	Error	RMSD	R_Error	Desolvation Energy	D_Error	Cluster Size	Van der waals energy	V_Error	Electrostatic Energy	E_Error	Restraints violation Energy	RT_Error	Burried Surface Area	B_Error	Z-Score	CLusters
		a.u.		Å		kcal/mol
		-129.6	4.8	0.7	0.4	-44	5	12	-85.3	5	-314.5	34.2	625	72.61	2235.4	47	-2.8	1
		-93.8	4.7	3.1	0.3	-47.2	7	10	-61.9	12.3	-220.7	22.5	594.9	89.98	2068.4	58.5	-0.2	2
		-92.8	12.4	8.1	0	-29.2	14.3	7	-61.1	6.3	-388.5	40.8	752.2	94.94	2134.1	140.5	-0.2	3
		-89.8	13	7.9	0.1	-39.9	6.6	5	-86.1	8.7	-181.6	11.5	724.8	113.58	2278.5	122.2	0	4
		-87.5	6.3	6.7	0	-39.4	4	5	-76.3	3.9	-154.4	15.9	590.3	88.88	1925.6	79.5	0.2	5
		-86.3	9.5	8	0.1	-39.5	16.5	8	-79.6	12.5	-218.3	39.4	765	75.83	2259.4	89.5	0.3	6
		-84.3	6.7	3.6	0.3	-51	4.1	4	-52.7	2.5	-229.9	35.9	653.9	85.29	1753.2	49	0.4	7
		-81.5	27.9	9.5	0.2	-33.7	5.5	4	-74.5	8.4	-163.9	57.6	594.4	141.59	2332.6	200.9	0.6	8
		-79.3	12.5	5.8	0.1	-21.9	7.2	4	-64.5	2.2	-218.4	59.4	508.9	46.42	2068.8	68.9	0.8	9

## Sheet: REn (CLCuKoV-Bu) _ToLCNDV
REn (CLCuKoV-Bu)-Rep (ToLCNDV)		HADDOCK SCORE	Error	RMSD	R_Error	Desolvation Energy	D_Error	Cluster Size	Van der waals energy	V_Error	Electrostatic Energy	E_Error	Restraints violation Energy	RT_Error	Burried Surface Area	B_Error	Z-Score	CLusters
		a.u.		Å		kcal/mol
		-58.6	31.8	1.8	1	-72.1	2.3	8	-126.6	9.3	-22.4	11	2130.1	235.78	3504	219	-1.6	1
		-26.9	9.4	7.3	0.1	-74	5.9	6	-116.2	14.7	-311	53.8	2244	104.59	3416.9	148.1	-0.9	2
		-27.1	28.2	8.7	0.2	-97.1	11.4	4	-133.8	5.1	-226.2	27.2	2490.3	167.53	3586.6	59.3	-0.9	3
		-17.5	12.5	15.1	0.3	-99	14.8	5	-109.6	12.6	-227	30.6	2369.5	157.9	3265.8	70.7	-0.4	4
		-14.4	29.1	6.6	0.3	-86.1	8.9	6	-108.2	2.7	-240.6	76.7	2280.6	270.91	2983.3	104.9	-0.3	5
		-6.1	23	10.3	0.1	-78.4	12	4	-115.2	6.5	-239.9	38.1	2354.4	178.05	3355.5	48.6	0.1	6
		-4.5	13.2	9.5	0.1	-83.8	8.1	5	-115.3	1.9	-263.6	56.2	2473.3	49.12	3211.4	192.4	0.2	7
		7.6	34.4	14.6	0.2	-94.7	8.9	4	-99.9	10.8	-186.3	47.4	2395.2	140	2912.9	217.3	0.8	8
		15	9	15.3	0.2	-66.6	9.6	5	-113.6	13	-264.9	36.3	2481.3	114.76	3311.2	251	1.1	9
REn (CLCuKoV-Bu)-TrAP (ToLCNDV)		HADDOCK SCORE	Error	RMSD	R_Error	Desolvation Energy	D_Error	Cluster Size	Van der waals energy	V_Error	Electrostatic Energy	E_Error	Restraints violation Energy	RT_Error	Burried Surface Area	B_Error	Z-Score	CLusters
		a.u.		Å		kcal/mol
		-103.2	30.5	0.9	0.5	-89	2.1	5	-134.5	4.8	-291.2	25.5	1785.4	265.13	3628.5	158.2	-1.5	1
		-100.6	10.9	2.5	0.1	-100.6	5.1	21	-140.2	7.1	-181.9	54.3	1765.4	120.89	3699.6	89.6	-1.4	2
		-85.7	17.8	8.6	0.4	-79.4	5.3	8	-131.1	6.6	-275.1	25.3	1798.6	101.81	3711.5	61.1	-0.8	3
		-73.2	17.3	19.4	0.5	-80.4	11.3	5	-118.9	9.1	-282	77.6	1824.7	208.08	3142.7	178	-0.3	4
		-70.2	8.1	20.1	0.1	-84.8	7.3	6	-115	7.4	-203.4	47.3	1702.8	94.24	3315.2	99.1	-0.2	5
		-63.1	17.4	19.7	0.1	-67.8	6.1	6	-121.3	4.3	-211.8	19.1	1683.4	111.49	3466.6	132.3	0.1	6
		-52.7	35.4	19.3	0.1	-55	4.8	4	-112	15	-270	73.7	1682.4	178.66	3486.5	195.4	0.5	7
		-40.9	15.9	12.4	0.2	-80.8	8	10	-118.6	8.1	-182.9	47.6	1951.3	156.99	3390.6	81.4	0.9	8
		-30.8	8.4	19.6	0.1	-73.6	4.3	8	-103.2	6.2	-201.5	12.8	1863.4	66.69	3180.8	51.4	1.3	9
REn (CLCuKoV-Bu)-REn (ToLCNDV)		HADDOCK SCORE	Error	RMSD	R_Error	Desolvation Energy	D_Error	Cluster Size	Van der waals energy	V_Error	Electrostatic Energy	E_Error	Restraints violation Energy	RT_Error	Burried Surface Area	B_Error	Z-Score	CLusters
		a.u.		Å		kcal/mol
		6	10.9	12.9	0.4	-57.1	7.8	9	-123.9	15.1	-315.7	59.9	3354.1	199.38	3540.5	164.8	-1.6	1
		12.2	14.4	12.8	0.1	-55.5	2.7	9	-111.8	4.9	-3152	52.3	2425.1	172.41	3345.1	136	-1.3	2
		23.3	8.3	16.7	0.1	-37.8	2.6	6	-129.6	3.1	-285.6	49.4	2478.6	102.31	3426.4	104.6	-0.6	3
		26.1	16.8	19.2	0	-53.7	2.5	10	-111.4	5.8	-295.2	37.5	2502.6	152.43	3122.2	94	-0.4	4
		29.1	33.2	16.3	0.4	-47	6.7	4	-113.6	8.3	-317.8	15.2	2531.7	240.29	3288.3	95.3	-0.2	5
		36.5	19.2	22.7	0.1	-45.7	15.8	4	-111.2	11.7	-299.5	50.1	2533.2	92.66	2989.2	135.9	0.2	6
		40.5	37.7	21.5	0.1	-46.1	13.3	4	-124.5	9.5	-187.8	62.9	2487.1	93.3	3207.4	161	0.4	7
		44.1	21.5	13.1	0	-55.5	3.1	5	-106.7	3.6	-253	31.9	2569.2	216.54	3107.6	81.6	0.7	8
		45.1	3.8	17.1	0.1	-58.9	6.5	8	-101.7	5.3	-175.1	18.7	2407.8	108.73	3214.7	69	0.7	9
REn (CLCuKoV-Bu)- AC4 (ToLCNDV)		HADDOCK SCORE	Error	RMSD	R_Error	Desolvation Energy	D_Error	Cluster Size	Van der waals energy	V_Error	Electrostatic Energy	E_Error	Restraints violation Energy	RT_Error	Burried Surface Area	B_Error	Z-Score	CLusters
		a.u.		Å		kcal/mol
		-45.6	14	9.3	0.3	-32.7	8.7	22	-107.7	14.2	-232.6	36.2	1412.5	75.4	2914.2	108.4	-1.8	1
		-34.3	12.2	10.6	0.1	33.7	8.3	7	-97.7	6.7	-216.6	38.8	1406.6	73.88	2445.2	135.7	-1	2
		-30.5	15.9	7.2	0.1	-22.2	10.3	9	-90	4.6	-256.4	16.8	1460.9	47.54	2723.5	80	-0.7	3
		-22.9	10	6.7	0.3	-18.7	5.9	8	-92.7	8.2	-194.1	25.2	1272.2	168.96	2436.8	104.2	-0.1	4
		-19.2	6.5	7.2	0.2	-46.8	5.3	7	-83.4	9.9	-253.6	49.9	1616.8	113.56	2539.1	61.4	0.1	5
		-19.1	10.7	6.7	0.2	-27.8	1.9	4	-95.9	6	-248.1	48.4	1359.1	51.52	2369.8	55.2	0.7	6
		-11.2	4	9.4	0.2	-30.4	13.7	8	-84.1	3.7	-201.6	15.5	1438.4	33.64	2216.3	122.2	0.9	7
REn (CLCuKoV-Bu)-CP (ToLCNDV)		HADDOCK SCORE	Error	RMSD	R_Error	Desolvation Energy	D_Error	Cluster Size	Van der waals energy	V_Error	Electrostatic Energy	E_Error	Restraints violation Energy	RT_Error	Burried Surface Area	B_Error	Z-Score	CLusters
		a.u.		Å		kcal/mol
		-63.7	6.5	10.7	0.1	-52.4	7.7	45	-117.9	7.5	-189.1	52.6	1444	57	3656.7	85.7	-1.9	1
		-56.2	12.2	1.3	0.8	-66.8	6.6	4	-105.8	7	-199.2	72.3	1561.5	30.6	3323.8	220.3	-1.4	2
		-45.1	18.9	17.2	0.1	-69.3	9.9	4	-103.3	6.9	-120.6	23.3	1587	155.57	3304	101	-0.7	3
		-37.4	12.2	10.8	0.1	-87.8	3.5	11	-93.7	6.5	-136.5	43.4	1714.4	165	2899.4	46	-0.1	4
		-35.1	15.8	25.2	0.2	-52.5	5.7	16	-103	3.5	-156.9	72.5	1526.7	87.04	3334.1	176.6	0	5
		-32.6	12.7	26.8	0.1	-79.7	3.8	4	-89	4.8	-209.2	29.9	1778.7	90	2888.6	143.2	0.2	6
		-25.1	8	28.3	0.1	-60.8	10.6	4	-91.5	5.7	-198.2	44.4	1778.6	147.91	2853.9	161.6	1.7	7
REn (CLCuKoV-Bu)- AV2 (ToLCNDV)		HADDOCK SCORE	Error	RMSD	R_Error	Desolvation Energy	D_Error	Cluster Size	Van der waals energy	V_Error	Electrostatic Energy	E_Error	Restraints violation Energy	RT_Error	Burried Surface Area	B_Error	Z-Score	CLusters
		a.u.		Å		kcal/mol
		-30.3	37	0.9	0.6	-35.7	3.4	7	-110	10.9	-29.2	37.4	1572.9	267.88	2940	229.4	-2.1	1
		3.1	3.7	14	0.1	-40.7	0.9	5	-92.5	10.8	-319.9	30	778.9	70.77	3012.7	62.9	-1.1	2
		12	6	14.5	0.2	-38.9	1.9	5	-99.3	5.1	-319.3	24	799	44.63	2730.3	142.6	-0.8	3
		13.2	14.9	13.1	0.9	-41.5	8.3	24	-92.5	2.1	-226.8	17.7	754.2	90.76	2779.2	57.8	-0.6	4
		15.7	14.1	6.7	0.3	-31.1	4.1	7	-77.6	1.5	-225.3	50.9	871.9	103.26	2592.8	99.6	-0.3	5
		19	5	4.1	0.3	-50.7	8.9	6	-83.4	6	-178.6	47	767.4	92.63	2874.9	130.7	0.3	6
		23	4	16.2	0.1	-33.6	11.2	4	-82.9	4.2	-173.1	42.1	780.1	67.9	2495	74.5	0.5	7
REn (CLCuKoV-Bu)-MP (ToLCNDV)		HADDOCK SCORE	Error	RMSD	R_Error	Desolvation Energy	D_Error	Cluster Size	Van der waals energy	V_Error	Electrostatic Energy	E_Error	Restraints violation Energy	RT_Error	Burried Surface Area	B_Error	Z-Score	CLusters
		a.u.		Å		kcal/mol
		-109.1	11.4	15.3	0.2	-54.6	1.6	15	-112.8	10	-291	51.2	1164.8	117.42	3500.9	70.9	-1.8	1
		-102.6	16.3	6.6	0.1	-76.7	10.8	4	-123.3	8.5	-231	38.5	1437	92.58	3277	220	-1.5	2
		-82.1	18.2	15.6	0.1	25.3	6.3	4	-113.6	12.5	-255.8	41.5	1081.6	148.2	3278.7	132.4	-0.6	3
		-75.6	18.9	10.9	0.3	-36.6	13	5	-104.5	8.9	-232.9	25.8	1120.1	96.57	3111.1	49.1	-0.3	4
		-69.7	5.6	6.2	0.1	-69.7	5.6	8	-106	2.1	-220.5	27.6	534.1	53.71	3162	122.5	0	5
		-62	14.2	11.8	0.2	-62	14.2	4	-106.8	4.3	-255.4	32.1	530.1	56.41	3091	59.1	-0.1	6
		-58.6	26	16.9	0.2	-58.6	26	5	-118.2	3	-240.4	23.5	605.1	106.23	3478.3	154.9	0.6	7
REn (CLCuKoV-Bu)-NSP (ToLCNDV)		HADDOCK SCORE	Error	RMSD	R_Error	Desolvation Energy	D_Error	Cluster Size	Van der waals energy	V_Error	Electrostatic Energy	E_Error	Restraints violation Energy	RT_Error	Burried Surface Area	B_Error	Z-Score	CLusters
		a.u.		Å		kcal/mol
		-85	14	0.7	0.4	-46.4	6	16	-115.7	4.4	-323.9	52.3	1414.9	16.04	3126.7	116.04	-2.6	1
		-50.4	15.4	10.8	0.1	-72.4	8.1	9	-99.5	5.5	-216	57.2	1646.4	135.5	2968	146.8	-0.6	2
		-49.9	6.5	12.8	0.1	-78.8	3.1	7	-100	5.7	-206.8	23.2	1703.6	153.81	2794.5	74.8	-0.6	3
		-217.8	13	2.1	0.2	-124.3	6.8	8	-114.5	7.6	-333.8	51.1	877.9	168.69	3677.7	121.6	0.1	4
		-35.4	8.6	16.3	0.1	-65.3	6.7	8	-236.3	3.2	-236.3	34	1588.9	95.96	2380.7	95.5	0.3	5
		-35.1	26	15.6	0.2	-64.8	11.5	4	-70.8	8.2	-324.4	70.2	1654.3	76.93	2380.2	167.3	0.3	6
		-198.3	-13.7	14.3	0.1	-140.4	7.7	6	-101.5	8.8	-161.1	38.7	1724	172	2992.8	154.1	0.5	7
																		8
																		9

## Sheet: C4 (CLCuKoV-Bu) _ToLCNDV
C4 (CLCuKoV-Bu)-Rep (ToLCNDV)			HADDOCK SCORE	Error	RMSD	R_Error	Desolvation Energy	D_Error	Cluster Size	Van der waals energy	V_Error	Electrostatic Energy	E_Error	Restraints violation Energy	RT_Error	Burried Surface Area	B_Error	Z-Score	CLusters
			a.u.		Å		kcal/mol
			-65.1	18.5	12.9	0	-65	7.9	5	-99.6	9.2	-285.6	49.3	1566.1	150.14	3158.1	127.6	-1.6	1
			-61.6	7.4	7.3	0.2	-90.6	13.1	6	-107.8	7.6	-215.4	25.5	1798.7	165.1	3297.4	59.8	-1.4	2
			-40.4	21.5	3.4	0.2	-83	9.3	4	-101.6	7.2	-219.8	46.7	1880.7	139.63	3035	245.8	-0.4	3
			-40.2	34.7	0.9	0.5	-75.3	15.2	4	-88.2	9.6	-276.8	17.7	1786.9	119.55	2809	125.1	-0.4	4
			-36.7	34.7	5.2	0.3	-74.9	12	4	-96.1	6.6	-212.8	31.1	1769.1	231.05	2918.1	174.6	-0.2	5
			-34.7	25	5.6	0.3	-103.3	12.3	5	-85.5	11.9	-142.7	32.7	1825.9	140.95	2545.8	152.7	-0.1	6
			-19.7	4.3	10.8	0.6	-84.9	13.8	4	-70.3	5.4	-212.8	9.2	1780.7	175.43	2206.8	198.4	0.6	7
C4 (CLCuKoV-Bu)-TrAP (ToLCNDV)			HADDOCK SCORE	Error	RMSD	R_Error	Desolvation Energy	D_Error	Cluster Size	Van der waals energy	V_Error	Electrostatic Energy	E_Error	Restraints violation Energy	RT_Error	Burried Surface Area	B_Error	Z-Score	CLusters
			a.u.		Å		kcal/mol
			-73.3	20.9	3.7	0.2	-49	9.5	5	-106.9	5.6	-228.1	31.2	1282.3	141.24	3132	222.8	-1.5	1
			-65.4	29.2	3.6	2.3	-66	5.7	4	-103.2	14.5	-232.4	9.7	1502.8	154.66	2948.8	291.9	-1	2
			-60.7	15.9	4.8	0.4	-72.5	5.3	5	-96.1	5.8	-172.2	23.2	1422.7	96.68	2803.6	86.5	-0.7	3
			-54.8	10.7	15.3	0.1	-71.8	1.7	5	-97.1	6.5	-199.7	14.8	1540.9	75.03	2740.1	74.8	-0.3	4
			-54.6	14	16.9	0.1	-70.1	10.4	5	-105.1	3.1	-198.1	22.1	1602.4	85.25	1098.7	146.1	-0.3	5
			-53.3	13	17.9	0	-49.2	8.1	10	-105.3	11.4	-203.9	42.9	1419.5	61.38	3144.2	58.8	-0.2	6
			-49.8	2.9	9.1	0.1	-59.3	10.8	12	-83.7	5.2	-191	56.2	1314.8	80.86	2724.6	38.7	0.1	7
C4 (CLCuKoV-Bu)-REn (ToLCNDV)			HADDOCK SCORE	Error	RMSD	R_Error	Desolvation Energy	D_Error	Cluster Size	Van der waals energy	V_Error	Electrostatic Energy	E_Error	Restraints violation Energy	RT_Error	Burried Surface Area	B_Error	Z-Score	CLusters
			a.u.		Å		kcal/mol
			-35.4	12.2	18.8	0	-68.5	5.7	18	-114.9	8.9	-216	46.6	1911.6	146.25	3083.4	157.3	-1.7	1
			-28.3	18	13.2	0.1	-58	3.2	8	-108.9	6.8	-260.5	24.8	1907.3	111.78	2804.7	124.5	-1.2	2
			-22.5	29.8	0.9	0.6	-42.4	7.6	6	-98	12.4	-322.2	74.3	1824.7	85.25	2746.6	197.9	-0.9	3
			-15.9	15.1	14.9	0	-46.1	14.2	7	-92.7	18.9	-359	98.4	1948.3	144.77	2869.8	114.8	-0.5	4
			-5.9	24.5	14.2	0	-49.9	10.2	5	-93.9	7.9	-197.4	34.4	1773.5	107.16	3013.5	148.8	0.1	5
			-5.4	12.7	13.3	0.2	-44.6	6.9	6	-88.8	7.2	-347.9	55	1975.5	157.32	2632.2	172.7	0.1	6
			2.5	6.9	12.9	0	-39.8	5.4	5	-95.3	1.2	-260.1	59.3	1896.4	86.4	2873.8	71	0.6	7
C4 (CLCuKoV-Bu)-AC4 (ToLCNDV)			HADDOCK SCORE	Error	RMSD	R_Error	Desolvation Energy	D_Error	Cluster Size	Van der waals energy	V_Error	Electrostatic Energy	E_Error	Restraints violation Energy	RT_Error	Burried Surface Area	B_Error	Z-Score	CLusters
			a.u.		Å		kcal/mol
			-79.3	8.1	1	0.8	-40.1	6.3	28	-84.6	4.8	-215.1	20.2	883.6	42.43	2290.3	110.8	-2.1	1
			-69.2	4.9	5.5	0.8	-33	9.8	14	-67.1	3.8	-258.1	23	825.7	105.48	2047.4	96.9	-1.2	2
			-64.7	11.5	6.2	0.1	-34.3	6.8	4	-78.5	5	-215.8	61	913.4	61.38	2102.8	120.1	-0.9	3
			-53.1	10.3	16	0.1	-31.6	3.1	4	-76.9	7.2	-156.1	44	866.7	107.29	1999.7	109.1	0.1	4
			-51.5	18.3	14.3	0.1	-16.3	3.1	5	-78.8	2.2	-150.1	20.9	736.2	107.75	2170.6	43.3	0.2	5
			-48.2	12.5	11.5	0.1	-37.7	3.5	7	-68.2	8.1	-163.1	33	902.4	25.85	1831.1	86.8	0.5	6
			-46.6	20.9	1.6	0.2	-28.5	10.7	4	-75.2	5.2	-225.7	55.6	1021.3	74.07	2113	109	0.6	7
C4 (CLCuKoV-Bu)-CP (ToLCNDV)			HADDOCK SCORE	Error	RMSD	R_Error	Desolvation Energy	D_Error	Cluster Size	Van der waals energy	V_Error	Electrostatic Energy	E_Error	Restraints violation Energy	RT_Error	Burried Surface Area	B_Error	Z-Score	CLusters
			a.u.		Å		kcal/mol
			-91.9	14.1	2.1	1.2	-44.1	12.5	7	-90.1	3.8	-298.4	25.8	1020.4	58.9	2940	234.1	-2.4	1
			-62.3	6.2	3.6	0.2	-58.8	6.3	39	-83.9	7.2	-191.1	10.5	1185.3	90.88	2838.6	67.3	-1	2
			-49.1	9.2	11.9	0.1	-60	8.4	12	-92.5	8.4	-146.3	65.2	1325.8	76.96	2605.8	97.1	-0.4	3
			-41.7	12.4	7.8	0.2	-52.9	4.8	10	-75.2	2.7	-215.7	9.1	1295.1	69.47	2275.4	68.6	0	4
			-36.9	23.1	4.9	0.2	-62.9	7.2	4	-81.6	8.4	-139	70	1353.6	99.16	2576.1	110	0.2	5
			-34.1	7.2	8.1	0.3	-57.9	4.8	5	-60.2	4.5	-196.3	30.4	1232.9	32.96	2373.8	165.1	0.3	6
			-33.5	5.3	14.4	0.1	-70	4.7	13	-66	5.7	-127.4	10.4	1280.3	47.19	2287.7	157	0.4	7
C4 (CLCuKoV-Bu)-AV2 (ToLCNDV)			HADDOCK SCORE	Error	RMSD	R_Error	Desolvation Energy	D_Error	Cluster Size	Van der waals energy	V_Error	Electrostatic Energy	E_Error	Restraints violation Energy	RT_Error	Burried Surface Area	B_Error	Z-Score	CLusters
			a.u.		Å		kcal/mol
			-74.4	18.9	0.7	0.4	-31.2	7.4	9	-85.2	5	-292.8	27.9	1006.4	175.49	2554.8	93	-1.6	1
			-71.1	5.5	2.5	0.6	-36.3	6.6	22	-79.1	8.7	-332.1	48.4	1107.1	66.22	2570.8	93.8	-1.4	2
			-63.1	7.9	19.6	0.1	-17.3	14.5	15	-84.8	5.8	-307.4	48.2	1004.8	52.7	2483.7	100.6	-0.9	3
			-50.1	3.2	15.4	0.1	-36.1	4.1	12	-92.8	7.8	-193.6	37.2	1174	30.29	2539.3	104.2	0	4
			-49.9	12.8	3.3	0.1	-39.1	3.7	6	-82.7	5.5	-250.7	47.1	1220.3	64.22	2499.1	158	0	5
			-49.1	16.9	3.8	0.1	-31.6	4.1	4	-71.7	5	-302.3	23.6	1146	187.5	2442.2	1062	0	6
			-41.1	13.5	6.1	0.1	-29.4	8.9	11	-71.6	4.7	-265.7	65.6	1131.4	111.64	2261.8	93.4	0.6	7
C4 (CLCuKoV-Bu)- MP (ToLCNDV)			HADDOCK SCORE	Error	RMSD	R_Error	Desolvation Energy	D_Error	Cluster Size	Van der waals energy	V_Error	Electrostatic Energy	E_Error	Restraints violation Energy	RT_Error	Burried Surface Area	B_Error	Z-Score	CLusters
			a.u.		Å		kcal/mol
			-160.9	14.7	1	0.6	-50.8	8.9	15	-120.1	8.7	-385.1	75.3	870.6	62.32	3762.4	75.5	-1.8	1
			-145.1	5.1	11.6	0.2	-41.1	6.5	9	-110.1	4.8	-340.2	32	741.5	93.74	3149	83.3	-1.1	2
			-126	19.9	14.6	0	-21.1	7.2	4	-116.7	7.6	-334.7	53.3	788.4	44.41	3862	155.4	-0.3	3
			-122	7.4	8.3	0.3	-56.6	7.1	7	-93.1	6	-270.8	46.1	881.9	65.45	3309.4	95.3	-0.1	4
			-117.9	8.6	14.1	0.7	-50.8	3.7	13	-99.5	9.5	-242.2	42.8	808.7	151.48	2883.3	161	0	5
			-97.5	25.8	7.7	0.2	-33.4	6.4	4	-103.8	12.9	-199.9	60.9	796.7	50.41	3272	205.3	0.9	6
			-91.5	17.7	12.2	0.1	-45.4	5.7	6	-86.6	6.9	-161.3	45.3	727.1	56.4	2772.2	110	1.1	7
C4 (CLCuKoV-Bu)-NSP (ToLCNDV)			HADDOCK SCORE	Error	RMSD	R_Error	Desolvation Energy	D_Error	Cluster Size	Van der waals energy	V_Error	Electrostatic Energy	E_Error	Restraints violation Energy	RT_Error	Burried Surface Area	B_Error	Z-Score	CLusters
			a.u.		Å		kcal/mol
			-129.2	16.9	1.2	0.7	-82	6.8	11	-77.2	4.5	-310.8	102	921.4	73.1	2539.8	177.2	-2.2	1
			-101.5	4.3	15.7	0	-80.9	13.4	10	-73.1	4	-280.5	46.1	1085.3	104.24	2401.5	97.8	-0.7	2
			-100.5	1.2	12.8	0.1	-73	4.4	31	-75.8	1.9	-241.5	23.6	966.4	56.09	2167.6	120.4	-0.7	3
			-99.6	9.1	13.8	0.1	-80.2	12.1	6	-70.2	7.3	-320.2	57	1147.5	64.29	2298.7	72.6	-0.6	4
			-80.1	6.9	11.4	0	-62.1	19.3	5	-77.5	8.8	-263.9	74	1122.4	113.88	2532.2	143.4	0.4	5
			-79.3	12.3	5.6	1.2	-79.9	8.3	5	-75	11.1	-166.9	25	1090.4	109.36	2278.1	214.8	0.4	6
			-77.6	2.3	2.8	0.6	-74.1	3.7	5	-73.1	3.8	-169.1	42.5	1034.8	66.16	2261.4	36.1	0.5	7

## Sheet: CP (CLCuKoV-Bu) _ToLCNDV
CP (CLCuKoV-Bu)-Rep (ToLCNDV)			HADDOCK SCORE	Error	RMSD	R_Error	Desolvation Energy	D_Error	Cluster Size	Van der waals energy	V_Error	Electrostatic Energy	E_Error	Restraints violation Energy	RT_Error	Burried Surface Area	B_Error	Z-Score	CLusters
			a.u.		Å		kcal/mol
			-100.3	14.9	27.8	0.1	-80.3	8.3	11	-118.5	7	-362.8	55.8	1710.6	63.73	3857	260.4	-1.8	1
			-88.4	11.5	28.3	0.1	-103.9	18.9	10	-118.9	11.6	-148.2	20.3	1640.1	82.71	3614.1	161.6	-11.1	2
			-81.9	9.7	1.1	0.2	-99	9.4	8	-91.4	8.6	-299.2	70.4	1683	200.15	3392.4	158.1	-0.7	3
			-75.6	2.2	2.8	0.1	-90.5	7.2	5	-125.3	5.5	-280.4	30.6	1962.8	87.69	3945.1	102.9	-0.3	4
			-73	32.5	2.9	1.8	-91.9	24.3	13	-96	8.1	-314	53.9	1777.6	134.67	3816.2	353.7	-0.2	5
			-69.9	16.7	32.1	0.1	-97.2	14.6	4	-101	7.2	-241.4	58.2	1766.1	110.38	3238.3	114	0	6
			-65.6	28.2	23.7	0.2	-89.5	28.8	5	-120.6	6.9	-196.4	28.8	1927.4	122.93	3719.8	165.1	0.3	7
CP (CLCuKoV-Bu)-TrAP (ToLCNDV)			HADDOCK SCORE	Error	RMSD	R_Error	Desolvation Energy	D_Error	Cluster Size	Van der waals energy	V_Error	Electrostatic Energy	E_Error	Restraints violation Energy	RT_Error	Burried Surface Area	B_Error	Z-Score	CLusters
			a.u.		Å		kcal/mol
			-185.3	6.6	0.7	0.4	-95.4	6.5	8	-131.5	7.6	-345.7	25.9	1108.4	110.87	4146.2	115.6	-2.2	1
			-117	16.2	10.2	0.1	-77.5	8.5	7	-127.8	10.2	-311.1	56.3	1505.9	205.53	3884.5	136.4	-0.8	2
			-97.1	8.4	22.5	0.1	-85.2	7.3	9	-106.4	6.5	-248.8	30.6	1442.7	45.98	3408.7	124.8	-0.4	3
			-90.2	11.4	22.1	0.2	-84.8	5.2	21	-102.9	2	-180.6	34.5	1335.8	69.3	3163.6	41.5	-0.3	4
			-82.2	31.4	22.2	0.1	-96.9	6.6	5	-114.3	14	-172.7	43.1	1635.6	132.03	3749.6	295	-0.1	5
			-76.4	8	13.5	0.2	-90.4	8	15	-92.3	6.3	-211.4	26.2	1486.1	107.63	3098.4	143.9	0	6
			-53.8	16.3	23	0.1	-90.7	7.3	6	-77.6	10.3	-146.4	25.2	1437.4	48.94	2414.8	148.8	0.4	7
CP (CLCuKoV-Bu)-REn (ToLCNDV)			HADDOCK SCORE	Error	RMSD	R_Error	Desolvation Energy	D_Error	Cluster Size	Van der waals energy	V_Error	Electrostatic Energy	E_Error	Restraints violation Energy	RT_Error	Burried Surface Area	B_Error	Z-Score	CLusters
			a.u.		Å		kcal/mol
			7.8	6.3	20	0.4	-67.3	2	9	-84.9	5.7	-194.2	33.7	1988.3	122.36	2560.8	127.4	-1.7	1
			25.1	6.4	17.9	0.2	-60.5	12.5	4	-92.3	5.5	-233.7	56.1	2246	53.68	2793.1	55.1	-0.3	2
			30.5	27	17.6	0.2	-52.2	14.3	4	-93.9	8.4	-261.4	35.1	2288.8	55.43	2658.3	246.1	0.1	3
			37.9	6.1	16.8	0.1	-55.2	6.2	6	-78.1	1.3	-270.2	7.3	2252.7	37.94	2494.8	38.6	0.6	4
			47.1	8.6	18.9	0.2	-62.7	4.6	4	-76.2	7.4	-164.4	10.6	2188.9	86.42	2300.6	192.6	1.3	5
CP (CLCuKoV-Bu)-AC4 (ToLCNDV)			HADDOCK SCORE	Error	RMSD	R_Error	Desolvation Energy	D_Error	Cluster Size	Van der waals energy	V_Error	Electrostatic Energy	E_Error	Restraints violation Energy	RT_Error	Burried Surface Area	B_Error	Z-Score	CLusters
			a.u.		Å		kcal/mol
			-82.5	4.6	13	0.1	-68.2	5.5	27	-87	3.1	-129.8	29.5	991.8	33.49	2310.3	72.2	-1.7	1
			-70.8	8.1	13.7	0.2	-67.7	12.1	20	-58	3.8	-133.2	48	816.8	93.51	1821.5	126.3	-1	2
			-61.1	5.7	14.1	0	-68.5	6.1	7	-62.6	3.5	-129.7	12.9	959.3	102.89	1938	50.2	-0.4	3
			-55	6.1	11.7	0.3	-56.5	9.1	18	-67.9	4.8	-124.1	22.6	942.9	40.88	1961	153.3	-0.1	4
			-48.1	9.7	13.4	0.1	-54.7	2.9	6	-77.2	4.5	-86.1	19	1009.8	28.8	1863.6	87.9	0.3	5
			-47.8	22.5	11.7	0.3	-69.9	3.8	4	-68.1	4.2	-55.2	26.6	1012	167.22	1995.4	93.5	0.3	6
			-40.1	5.4	7.2	0.1	-34.9	3.7	4	-92.2	7.2	-125.5	21.4	1121.5	78.81	2688.6	137.2	0.8	7
CP (CLCuKoV-Bu)-CP (ToLCNDV)			HADDOCK SCORE	Error	RMSD	R_Error	Desolvation Energy	D_Error	Cluster Size	Van der waals energy	V_Error	Electrostatic Energy	E_Error	Restraints violation Energy	RT_Error	Burried Surface Area	B_Error	Z-Score	CLusters
			a.u.		Å		kcal/mol
			-163.4	8.4	0.6	0.3	-112.2	3.5	64	-127.8	4.4	-164.4	41	1095.7	122.64	3991.7	97.6	-2.1	1
			-114.3	18	2.3	0.3	-100.3	8.1	4	-118.5	2.3	-92.6	10	1230.2	131.16	3702.5	72.2	-1	2
			-72.8	20	18.7	0.2	-72.4	9.4	7	-95.8	12.2	-199.9	83.2	1353	178.79	3657.5	109.5	-0.2	3
			-50.2	4.1	19.3	0.3	-96.4	6.7	11	-70.9	3.4	-91.3	20.3	1353.9	65.09	2582.2	66.2	0.3	4
			-41.7	20	17.1	0.1	-84.6	5.4	4	-87.6	11.1	-71.8	49.4	1448.6	114.25	3045.8	203	0.5	5
			-38.5	24.7	18.4	0.1	-75.8	12.3	12	-88.7	9.7	-154.2	40.2	1567.8	87.95	3268.3	192	0.6	6
			-34.3	6.1	26.3	0.1	-99.1	23.1	9	-80.2	7.7	-99.1	23.1	1360.5	56.8	2890.6	112.2	0.7	7
CP (CLCuKoV-Bu)-AV2 (ToLCNDV)			HADDOCK SCORE	Error	RMSD	R_Error	Desolvation Energy	D_Error	Cluster Size	Van der waals energy	V_Error	Electrostatic Energy	E_Error	Restraints violation Energy	RT_Error	Burried Surface Area	B_Error	Z-Score	CLusters
			a.u.		Å		kcal/mol
			-64.2	8.8	16	0.4	-61.2	4.6	4	-74.5	5	-318.2	32.8	1350.5	75.64	2469.4	117.3	-1.5	1
			-55	17.2	20	0	-59.4	6.3	5	-71.4	3.3	-225.2	38.8	1209.4	182.59	2189.5	110.8	-1	2
			-50.7	8	19.3	0.2	-54.2	5.4	54	-70.4	0.2	-256.4	36.5	1251	112.1	2112.1	93	-0.7	3
			-41.1	10.5	17	0.1	-65.8	13.3	6	-71.5	3.5	-159.3	31.1	1280.3	98.98	2193.1	123.9	-0.2	4
			-36.7	14.4	17.9	10.5	-48.4	5.8	5	-73.1	10.5	-195.4	45.4	1238.7	21.77	2125.1	86.2	0.1	5
			-26.2	21.1	11.3	0.3	-25.4	15.5	4	-66.6	10.6	-303.6	100.9	1265.5	78.33	2417.9	231.5	0.7	6
			-19.7	12.9	19.3	0.1	-52.1	7.8	4	-67.2	5.9	-150	42.5	1259.9	30.23	1949.7	94.9	1	7
CP (CLCuKoV-Bu)-MP (ToLCNDV)			HADDOCK SCORE	Error	RMSD	R_Error	Desolvation Energy	D_Error	Cluster Size	Van der waals energy	V_Error	Electrostatic Energy	E_Error	Restraints violation Energy	RT_Error	Burried Surface Area	B_Error	Z-Score	CLusters
			a.u.		Å		kcal/mol
			-166.9	6.9	21.9	0.2	-51.5	7.8	8	106.1	7.4	-455.2	18.1	817	138.33	3553	95.1	-2.6	1
			-129.8	12.3	11.6	0.1	-70.2	5.9	4	1-2.3	10.3	-264.3	42.6	955.8	62.82	2890.3	119.5	-0.5	2
			-129.3	10.6	26.3	0.1	-73.8	14.3	22	106.9	7.6	-161	39.5	837	60.65	3047.9	141.9	-0.5	3
			-121	9	22.9	0.4	-76	8.7	11	-93	10.7	-193.9	47.8	867.9	138.57	2935.1	90.4	0	4
			-117	11.5	26.6	0.1	-54.6	6.7	8	-94.1	4.5	-274.5	96.3	866.8	188.36	3068.5	185.4	0.2	5
			-115.2	2.9	17.9	0.3	-69.2	8.5	7	-105.5	13.4	-124.1	16.8	842.4	51.12	3166	203.9	0.3	6
			-111.9	2.4	14.2	0.1	-62.2	4.8	8	-108.5	4.8	-128.5	21.1	845	72.35	3031.2	122.3	0.5	7
CP (CLCuKoV-Bu)-NSP (ToLCNDV)			HADDOCK SCORE	Error	RMSD	R_Error	Desolvation Energy	D_Error	Cluster Size	Van der waals energy	V_Error	Electrostatic Energy	E_Error	Restraints violation Energy	RT_Error	Burried Surface Area	B_Error	Z-Score	CLusters
			a.u.		Å		kcal/mol
			-110.6	7.1	15.9	0.4	-89	3.7	31	-87.2	3.1	-230.2	23.1	1116.2	70.39	2627.7	58.3	-2.1	1
			-99	7.3	19.4	0.4	-91.6	8.6	28	-70	5.2	-207.4	31.5	-1040.06	104.85	2304.5	231.6	-1.2	2
			-87.8	11.4	23.7	0.3	-77.8	8.4	7	-78.6	5.6	-285.9	118.1	1258	78.71	2624.1	105.1	-0.3	3
			-84.6	7.1	23.4	0.2	-78.3	6.1	5	-76	2.1	-234.1	23.4	1164.9	40.98	2177.5	54.8	-0.1	4
			-84	26.3	16.4	0.2	-107.9	15.2	4	-64	7.1	-109.7	15.2	1098.6	166.17	2180.6	94.5	0	5
			-84	7.4	21.8	0.1	-92.4	11.1	6	-61.2	6.2	-178.9	15.4	1053.7	159.21	2119.1	66.3	0	6
			-79.9	7.4	15.1	0.3	-72.1	6.3	7	-79.3	4.5	-248.6	42.7	1212	46.11	2611.1	92.6	0.3	7

## Sheet: V2 (CLCuKoV-Bu) _ToLCNDV
V2 (CLCuKoV-Bu)-Rep (ToLCNDV)			HADDOCK SCORE	Error	RMSD	R_Error	Desolvation Energy	D_Error	Cluster Size	Van der waals energy	V_Error	Electrostatic Energy	E_Error	Restraints violation Energy	RT_Error	Burried Surface Area	B_Error	Z-Score	CLusters
			a.u.		Å		kcal/mol
			-71.3	17.2	110	0	-90.3	6.8	6	-83.5	12.1	-295.3	51	1615.5	142.78	2698.2	160.9	-1.1	1
			-66.2	18.2	6.3	0.2	-85.5	17.8	4	-85.3	4.7	-247.4	13.1	1541.3	126.55	2639	126.5	-0.8	2
			-60	3.8	7.5	0.2	-76.6	5.2	9	-85.9	6.4	-284.7	29.1	1593.9	130.9	2582.5	102.6	-0.5	3
			-59.2	2.7	5.2	0.3	-76.3	9.7	15	-99.8	4.4	-230.7	47	1629	27.09	2920.8	222.1	-0.5	4
			-57.7	21.8	23	0.1	-58.9	9.1	5	-108.3	10.5	-354.4	60	1804.5	32.56	3697	199.1	-0.4	5
			-45.5	25.8	10.4	0	-80	10.2	6	-98.2	18.8	-156.1	49.5	1639.2	108.28	2647.2	216.1	0.3	6
			-33.1	31.9	22.6	0.1	-59.1	8.9	5	-98.1	7.6	-221.9	55.5	1682.9	202.33	3282	143.5	1	7
V2 (CLCuKoV-Bu)-TrAP (ToLCNDV)			HADDOCK SCORE	Error	RMSD	R_Error	Desolvation Energy	D_Error	Cluster Size	Van der waals energy	V_Error	Electrostatic Energy	E_Error	Restraints violation Energy	RT_Error	Burried Surface Area	B_Error	Z-Score	CLusters
			a.u.		Å		kcal/mol
			-87.5	21.2	0.8	0.5	-49.9	5.8	7	-124.5	13.9	-303.3	80.2	1476.3	131.99	3345.3	59.6	-1.7	1
			-78.8	10.5	14.1	0.1	-56	5.2	5	-123.6	3.6	-225.3	24.5	1458	68.21	3242.5	111.9	-1.3	2
			-62	9.6	11.1	0.4	-53.3	8.6	6	-93.1	8.6	-199.1	16.3	1242.4	77.61	2575.5	81.1	-0.5	3
			-56.8	18.2	15.1	0	-84.3	7.5	11	-94.7	10.2	-120.3	35.3	1463.3	70.55	2666.1	145	-0.3	4
			-55.7	13.7	7	0.4	-69.3	10.1	5	-79.1	16.5	-177.4	46.4	1282.6	140.46	2361.9	120.5	-0.2	5
			-55.1	6.8	14.9	0.1	-61.6	8.8	5	-92.6	7.6	-194.4	38.1	1379.6	113.92	2508	119.3	-0.2	6
			-36.3	138	14.2	0.2	-68	9.9	4	-80	4.9	-207.6	25.5	1531.6	102.58	2248.9	96.2	0.6	7
V2 (CLCuKoV-Bu)-REn (ToLCNDV)			HADDOCK SCORE	Error	RMSD	R_Error	Desolvation Energy	D_Error	Cluster Size	Van der waals energy	V_Error	Electrostatic Energy	E_Error	Restraints violation Energy	RT_Error	Burried Surface Area	B_Error	Z-Score	CLusters
			a.u.		Å		kcal/mol
			-20.1	26.2	15.9	0.5	-47.3	7.7	5	-96.9	5.6	-302.4	53.4	1845.4	138.22	2681.3	20.4	-1.9	1
			-5.4	12.4	15.4	0.2	-36.1	6	7	-81.1	8.7	-314.3	31.1	1746.8	66.49	2477.7	56.5	-1.1	2
			-0.7	16.6	14.2	0.1	-48.8	10.9	4	-77.6	15.2	-274.6	18.5	1805.8	68.58	2475.8	90.6	-0.8	3
			7.1	11.7	12.4	0.3	-41.1	8.5	4	-77.1	4.6	-237.4	44.2	1727.3	94.66	2520.8	73.9	-0.4	4
			10.9	9.7	5.2	0.5	-41.5	6.1	4	-92.6	5.1	-221.5	27.2	1893	118.09	2595.5	123.1	-0.1	5
			18.5	9.5	12.4	0.1	-59.5	6.9	4	-100.6	4	-146.5	15.7	2079.3	117.25	2780.6	93.1	0.3	6
			20.2	16.5	15.2	0	-49.8	7.8	5	-79	5	-202.1	5	1994.7	111.33	2278	56	0.4	7
V2 (CLCuKoV-Bu)-AC4 (ToLCNDV)			HADDOCK SCORE	Error	RMSD	R_Error	Desolvation Energy	D_Error	Cluster Size	Van der waals energy	V_Error	Electrostatic Energy	E_Error	Restraints violation Energy	RT_Error	Burried Surface Area	B_Error	Z-Score	CLusters
			a.u.		Å		kcal/mol
			-74.2	5.5	5	0.3	-24.2	7.1	15	-55.5	6.3	-340.9	42.1	736.3	40.52	1888.6	45.7	-1.7	1
			-69.6	19.6	1.1	0.7	-21.3	5.2	6	-70.2	6.9	-232.1	67	682.8	60.4	2009.7	122.2	-1.1	2
			-68.1	19.9	8.3	0.3	-27.5	8.2	4	-66.7	7.6	-241.9	50.2	745.1	74.1	2020.3	103.2	-0.9	3
			-67	9	12.9	0.2	-33.6	9.9	7	-54.6	6.2	-239.7	35.6	692	37.55	1869.8	53.8	-0.7	4
			-61.4	4.7	4.8	0.5	-28.5	8.1	25	-56.2	3.4	-225.8	64.6	685.7	69.68	1802.9	90.9	0	5
			-61	8.7	10.5	0.1	-4.8	11.9	5	-60.1	9.6	-360.2	34.9	758.6	35.99	1922.9	37.1	0.1	6
			-56.8	4.7	11.4	0.2	-22.1	11.5	5	-59.2	8.1	-227.1	43.8	699.9	36.33	1861.3	126	0.7	7
V2 (CLCuKoV-Bu)-CP (ToLCNDV)			HADDOCK SCORE	Error	RMSD	R_Error	Desolvation Energy	D_Error	Cluster Size	Van der waals energy	V_Error	Electrostatic Energy	E_Error	Restraints violation Energy	RT_Error	Burried Surface Area	B_Error	Z-Score	CLusters
			a.u.		Å		kcal/mol
			-98	18.5	0.6	0.4	-58.2	9.5	5	-97.5	6	254.5	58.3	1087	109.07	2655.4	35.2	-2.2	1
			-79.8	17.1	12.6	0.1	-60.2	6.6	20	-78.7	5.5	-264.4	54.8	1120.1	211.88	2431.9	65	-1	2
			-70.5	9.5	12.5	0.1	-47.6	9.7	6	-81.2	4.8	-282.7	23.1	1148.3	52.57	2605.4	80.1	-0.4	3
			-69.5	12.6	8	0.2	-52.5	9	10	-72.9	42.5	-247.2	42.5	1052.6	131.03	2303.5	34.6	-0.4	4
			-68.5	14.9	3.4	1.5	-54	10.1	12	-75.3	6	-251.8	38	1110.6	102.81	2300.9	135.8	-0.3	5
			-53.6	14.3	13	0.2	-58.3	0.3	9	-72.8	8.3	-200.1	48.6	1174.9	118.43	2185.9	18.4	0.7	6
			-52.9	22.2	12.6	0.1	-31.5	11.8	4	-74.2	5.5	-355	88	1237.6	63.5	2827.7	136.9	0.7	7
V2 (CLCuKoV-Bu)-AV2 (ToLCNDV)			HADDOCK SCORE	Error	RMSD	R_Error	Desolvation Energy	D_Error	Cluster Size	Van der waals energy	V_Error	Electrostatic Energy	E_Error	Restraints violation Energy	RT_Error	Burried Surface Area	B_Error	Z-Score	CLusters
			a.u.		Å		kcal/mol
			-78.7	5.3	0.6	0.4	-49.1	4	12	-90.6	5.8	-237.4	33	1084.4	121.02	2353.5	81.6	-1.8	1
			-65.5	8.8	7.1	0.2	-32.6	7.3	8	-73.3	5.9	-32.6	37.5	969	36.61	2229.4	127.4	-1.1	2
			-59.3	9.4	9.9	0.6	-36.9	9.1	12	-73.2	4.4	-316.3	46.5	1141.2	64.97	2147.2	72.4	-0.7	3
			-55.5	11.4	10.8	0.5	-43.2	4.8	6	-93.3	2	-168.1	34	1146.2	68.2	2270.7	76.8	-0.5	4
			-53.8	11.1	12	0.2	-35.4	9.5	5	-75.1	8.6	-216.1	51.4	1000	63.78	2113	77.77	-0.4	5
			-37.6	17.8	10.2	0.7	-29.9	9.2	4	-75.9	1.9	-191.4	25.9	1064.6	167.39	2124.5	41.7	0.5	6
			-35.1	5.6	12.3	0.2	-35.8	8.2	11	-51.7	3.6	-281.1	22.2	1087	15.59	1711.1	79.2	0.7	7
V2 (CLCuKoV-Bu)-MP (ToLCNDV)			HADDOCK SCORE	Error	RMSD	R_Error	Desolvation Energy	D_Error	Cluster Size	Van der waals energy	V_Error	Electrostatic Energy	E_Error	Restraints violation Energy	RT_Error	Burried Surface Area	B_Error	Z-Score	CLusters
			a.u.		Å		kcal/mol
			-199.4	4.3	0.9	0.5	-63.5	4.9	20	-106.4	4.8	-409	44.5	523.2	47.89	3092	132.1	-2.5	1
			-155.6	19.4	7.1	0.5	-33.7	4	5	-83.7	12.6	-454	79.3	525.1	94.52	3019.5	148.9	-0.8	2
			-148.4	8.3	5.6	0.2	-56.5	8.9	36	-111.9	6.2	-207.1	50.5	614.4	79.97	2798.1	103.7	-0.5	3
			-135.9	11.3	10.4	0.1	-33.9	19.8	21	-88.4	11.4	-238.6	44.2	606.4	107.15	2738	131.6	0	4
			-129.2	20.5	11.4	0	-37.3	8.6	5	-89.1	12.3	-346.1	91.7	663.9	32.32	3056.5	142	0.2	5
			-126.2	12.4	9.1	0.1	-27.1	3.1	6	-73.6	9.7	-420.4	30.4	585.8	69.83	2500.5	70.9	0.3	6
			-121	4.2	3.9	0.2	-45.7	5.9	6	-81.2	9.1	-298.7	50.4	656.6	41.89	2492.8	102	0.5	7
			-120.8	5.2	6.8	0.2	-45.5	5.7	10	-90.3	3	-270	44.3	689.9	75.41	2410.1	53.8	0.6	8
V2 (CLCuKoV-Bu)- NSP (ToLCNDV)			HADDOCK SCORE	Error	RMSD	R_Error	Desolvation Energy	D_Error	Cluster Size	Van der waals energy	V_Error	Electrostatic Energy	E_Error	Restraints violation Energy	RT_Error	Burried Surface Area	B_Error	Z-Score	CLusters
			a.u.		Å		kcal/mol
			-94.1	8.7	20.8	0.1	-75.4	11.8	27	-69	8.2	-160.4	49.3	824.2	116.37	2025	40.5	-1.7	1
			-92	15.5	1.4	1.1	-44.7	3.7	4	-77.6	4.8	-220.4	74.4	743.5	23.71	2511.9	53.4	-1.5	2
			-86.1	14.4	19.5	0	-55.3	7.8	7	-70.7	6.1	-236.1	38.9	871.5	74.09	2098	42.2	-0.8	3
			-79.3	11.1	5.5	0.1	-50.7	10.5	5	-83.6	8.4	-189.9	18.3	929.6	82.71	2540.7	147.2	0	4
			-78.1	5.9	19.9	0.2	-60.7	6.5	12	-68.2	9.2	-148.1	44.9	804.7	62.91	1962.9	96.1	0.2	5
			-76.8	8.3	23	0.1	-58.1	3.2	4	-87.2	8.4	-208	19.9	1101.8	25.57	2308.4	117.9	0.3	6
			-75.5	6.9	20.1	0.5	-61.5	9.3	4	-63	4.4	-161	38.9	811.7	34.5	1824	147	0.5	7

## Sheet: βC1Protein (CLCuMuB) _ToLCNDV
βC1 (CLCuMuB) - Rep (ToLCNDV)			HADDOCK SCORE	Error	RMSD	R_Error	Desolvation Energy	D_Error	Cluster Size	Van der waals energy	V_Error	Electrostatic Energy	E_Error	Restraints violation Energy	RT_Error	Burried Surface Area	B_Error	Z-Score	CLusters
			a.u.		Å		kcal/mol
			-48.6	14.6	4.5	0.1	-90.5	4.3	4	-80.9	2.9	-297.1	36.1	1822	117.14	2523.1	130.8	-1.3	1
			-46.8	3.9	4.3	0.3	-82.6	6.8	10	-94.9	6.9	-199.4	29.8	1705.6	167.37	2749.2	134	-1.2	2
			-43.6	10.6	9.4	0.1	-76.9	13	5	-98.5	9.5	-298.1	37.4	1914.1	193.43	3176.7	183.3	-1	3
			-35	10	11.6	0.1	-90	3	4	-79.5	7.5	-248.6	28	1841.8	101.22	2545.9	141.9	-0.4	4
			-30	12.7	6.1	0.4	-79.7	10.1	6	-83.1	11.8	-306.2	40.9	1940.8	107.56	2547.6	97.2	-0.1	5
			-29.2	15.3	12	0.2	-84.6	14.3	4	-90.1	4.9	-255.3	22	1965.6	19.29	2790.6	170.4	-0.1	6
			-23.6	12.8	12.1	0.1	-77.9	8.8	4	-91.4	6.1	-241.2	25.4	1938.6	160.37	2824.7	171	0.3	7
βC1 (CLCuMuB) - TrAP (ToLCNDV)			HADDOCK SCORE	Error	RMSD	R_Error	Desolvation Energy	D_Error	Cluster Size	Van der waals energy	V_Error	Electrostatic Energy	E_Error	Restraints violation Energy	RT_Error	Burried Surface Area	B_Error	Z-Score	CLusters
			a.u.		Å		kcal/mol
			-76.2	9.7	15.6	0.3	-69.2	2.7	6	-117	7.2	-131.7	35.3	1363.4	83.94	3279.5	93.2	-2.3	1
			-41.5	21.3	4	0.4	-52.2	7.8	4	-91.7	13.1	-258	46.1	1540.3	56.1	2858.5	186.8	-0.7	2
			-40.6	14.3	13.7	0.1	-83.8	11.9	22	-81.1	3.2	-105.1	53.4	1453	119.08	2459.7	128.4	-0.6	3
			-30.6	8.8	13.9	0.3	-76.6	8	7	-85	7.5	-111	17.2	1532.5	65.64	2475	130	-0.2	4
			-25.4	6.4	17.1	0.2	-64.9	2.9	18	-77.2	9.4	-148.3	30.3	1463.8	96.69	2231.8	62.7	0.1	5
			-21.5	5.7	13.8	0.3	-80.4	6.6	9	-70.5	8.9	-159.8	51	1613.2	53.82	2285.4	171.4	0.3	6
			-17.8	9.8	11.5	0.5	-74.2	10.8	5	-82.3	7.2	-102.6	32.2	1593.1	124.09	2506.2	57.9	0.4	7
βC1 (CLCuMuB) - REn (ToLCNDV)			HADDOCK SCORE	Error	RMSD	R_Error	Desolvation Energy	D_Error	Cluster Size	Van der waals energy	V_Error	Electrostatic Energy	E_Error	Restraints violation Energy	RT_Error	Burried Surface Area	B_Error	Z-Score	CLusters
			a.u.		Å		kcal/mol
			-141.1	22.5	2.5	0.7	-53.6	13	5	-93	7.2	-291.9	26.4	1909.3	108.72	2492.6	115.9	-2	1
			2.6	15.2	13.6	0.1	-60.9	3.7	14	-83.5	5.6	-285.3	27.5	2040.6	180.47	2584.2	81	-0.6	2
			4.1	9.3	16.8	0.1	-35.5	2.2	8	-94.5	6.2	-277.1	42.9	1894.5	122	2517.7	107	-0.4	3
			4.9	4.8	17.4	0.1	-56.6	9.1	8	-90.1	2.4	-275.1	58.3	2065	34.27	2557.5	69.4	-0.4	4
			5.8	15.3	14.8	0.1	-48.6	7.7	4	-95.1	6.3	-188.8	13.3	1873.1	200.79	2677.8	112.7	-0.3	5
			6.9	5.4	19.3	0.4	-55.5	2.3	12	-97.9	7.1	-216.2	51.9	2035.1	74.6	2695.5	72.6	-0.2	6
			9.4	11.2	8	0	-40.7	10.6	6	-74.1	8.2	-290.5	52.3	1823	80.44	2554.6	107.1	0	7
βC1 (CLCuMuB) - AC4 (ToLCNDV)			HADDOCK SCORE	Error	RMSD	R_Error	Desolvation Energy	D_Error	Cluster Size	Van der waals energy	V_Error	Electrostatic Energy	E_Error	Restraints violation Energy	RT_Error	Burried Surface Area	B_Error	Z-Score	CLusters
			a.u.		Å		kcal/mol
			-65.8	6.5	5	10.7	-37.6	0.2	5.7	-83.5	2.6	-117	30.7	786.9	56.47	2178.7	131.1	-1.2	1
			-64.8	21.3	0.7	0.4	-31.7	7.4	4	-65.2	5.3	-267.8	20.9	856.1	209.77	2013.3	82.4	-1.1	2
			-64.1	9	7.8	0.5	-34.6	6.9	8	-65.5	6.7	-234.3	21.4	828.4	128.13	2055.9	144.1	-1	3
			-62.6	3	4.7	0.1	-22.1	8.5	6	-59.1	6.3	-310.1	17.7	806	50.88	2060.3	95.6	-0.8	4
			-60.4	11.2	10.6	0.1	-40.5	6.5	6	-74.9	4.6	-146.8	52.7	844.4	63.3	1989.6	55.6	-0.6	5
			-52.3	5.5	9.8	0.2	-19.5	3.7	15	-66.5	4	-257.9	65.1	852.1	35.18	2005.3	96.4	0.3	6
			-47.6	11.5	8.1	0	-34.6	15.3	8	-68.4	6.9	-123.4	23.3	921.8	75.35	1830.5	60.9	0.9	7
βC1 (CLCuMuB) - CP (ToLCNDV)			HADDOCK SCORE	Error	RMSD	R_Error	Desolvation Energy	D_Error	Cluster Size	Van der waals energy	V_Error	Electrostatic Energy	E_Error	Restraints violation Energy	RT_Error	Burried Surface Area	B_Error	Z-Score	CLusters
			a.u.		Å		kcal/mol
			-62.9	7.2	11.1	0.1	-44.3	8	7	-73.7	8.7	-375.5	57.5	1301.6	59.22	2607.5	91.7	-1.1	1
			-62.1	14	10.2	0.2	-65.2	13.1	4	-68.5	5.8	-287.6	4.8	1291	40.58	2460.5	103.5	-1.1	2
			-61.6	12.4	6.7	0.2	-63.4	3.7	23	-61.2	7.3	-350.8	69.4	1331.6	50.02	2370	63.9	-1	3
			-58.2	11.3	3	0.6	-56.5	10.1	13	-70.5	4.6	-262.5	78.8	1213.3	42.81	2545.6	58.4	-0.8	4
			-55.4	5	12.7	0.5	-69.2	6.5	7	-69.2	6.5	-274.7	51.8	1308.5	88.67	2254.2	144.4	-0.6	5
			-41.5	12.9	7.8	0.3	-62.1	4.3	21	-55.2	6.4	-253	47.5	1263.8	111.96	2187.7	158.8	0.4	6
			-39.7	3.1	9.2	0.1	-65.7	7.4	18	-70.8	2.9	-249.9	34	1467.2	159.58	2305.7	113.8	0.5	7
βC1 (CLCuMuB) - AV2 (ToLCNDV)			HADDOCK SCORE	Error	RMSD	R_Error	Desolvation Energy	D_Error	Cluster Size	Van der waals energy	V_Error	Electrostatic Energy	E_Error	Restraints violation Energy	RT_Error	Burried Surface Area	B_Error	Z-Score	CLusters
			a.u.		Å		kcal/mol
			-75.7	26.1	0.6	0.4	-41.5	8.2	11	-76.6	6	-369.8	59.7	1163.7	149.2	2263	101.6	-2.8	1
			-40	24.3	3.4	0.2	-36.5	4.2	4	-68.3	5.7	-223.4	75.5	1096	126.63	2104.1	88.3	-0.7	2
			-27.7	28.3	15.3	0.2	-46.7	7.3	4	-65.7	11.4	-167.1	31.9	1180.7	99.95	2064.1	123.8	0.1	3
			-26.2	29.5	14.4	0	-46.4	9.6	8	-61.9	7.5	-225.2	66.5	1271.9	107.88	2104.2	170.3	0.1	4
			-23.6	15.4	5.7	0.2	-44.8	5.2	4	-74.4	1.4	-100.3	34.9	1156.9	146.89	1977.9	98.7	0.3	5
			-22.6	9	6.5	0.1	-42.4	4.9	5	-72.1	6.2	-172.7	21.7	1263.9	106.32	2057.8	103.6	0.4	6
			-21.1	16	13.9	0.1	-45.2	7.6	9	-79.9	6.9	-90.5	27.3	1229.2	128.91	2121.3	145.2	0.4	7
βC1 (CLCuMuB) - MP (ToLCNDV)			HADDOCK SCORE	Error	RMSD	R_Error	Desolvation Energy	D_Error	Cluster Size	Van der waals energy	V_Error	Electrostatic Energy	E_Error	Restraints violation Energy	RT_Error	Burried Surface Area	B_Error	Z-Score	CLusters
			a.u.		Å		kcal/mol
			-199.7	14.3	0.8	0.4	-60	11.6	20	-115.1	6.7	-500	30.9	754.2	32	3447.8	113.1	-2.4	1
			-154.6	13.3	3.6	0.4	-74.2	8.3	8	-81.1	5.4	-354.4	28.9	715.4	56.15	2886.2	25.4	-0.8	2
			-144.5	17.5	4.4	0.1	-51.5	6.8	7	-91.5	9.7	-426.9	32.7	838.8	90.24	2994.4	150.2	-0.4	3
			-144.4	10.3	11.3	0.4	-59.9	9.9	29	-95.3	8.8	-324.2	59.5	756.4	51.43	2795.1	189.3	-0.4	4
			-136	9	14	0.1	-61.8	7.2	7	-98.6	6.5	-327.5	48.2	898.3	33.88	3099	67.6	0.1	5
			116.1	8.2	9.4	0.1	-42.5	4	7	-85.5	2.3	-352.4	39.1	824.3	56.39	2777.1	48.7	0.7	6
			-115.4	19.2	11.3	0.6	-58.8	13.3	7	-74.9	11.5	-330.7	40.3	844.2	64.33	2473.8	147.7	0.7	7
βC1 (CLCuMuB) - NSP (ToLCNDV)			HADDOCK SCORE	Error	RMSD	R_Error	Desolvation Energy	D_Error	Cluster Size	Van der waals energy	V_Error	Electrostatic Energy	E_Error	Restraints violation Energy	RT_Error	Burried Surface Area	B_Error	Z-Score	CLusters
			a.u.		Å		kcal/mol
			-96.3	1.9	7.5	0.1	-82.1	6.2	62	-77.1	10.5	-179.3	67.2	988.3	110.24	2250.1	103.3	-1.9	1
			-92.5	7.8	14	0.8	-77.1	1.8	6	-79.6	8.4	-123.3	28	888.5	77.47	2160.7	125.4	-1.6	2
			-71.2	9.8	7.9	0.6	-66	8.2	8	-69.9	8.7	-171.8	101.4	990.5	59.6	2211.1	123.5	-0.3	3
			-67.9	13.2	5.6	0.3	-67.6	5.5	8	-69.1	2.6	-124.3	57.9	936.9	225.71	2164.4	111.4	-0.1	4
			-66.6	21	5.2	0.1	-77.2	5.6	5	-73.6	6.6	-76.4	16.8	995.3	141.82	2079.8	86.7	0	5
			-58.2	8.6	16.2	0.2	-65.3	7.1	4	-61.9	3.9	-160.7	15.8	1011.8	81.94	1919	120.4	0.5	6
			-55.5	9.6	15.4	0.1	-80.6	5.9	5	-58.4	6.2	-123.3	66.7	1082.4	72.89	1951.9	96.6	0.6	7
